# Supplementary material
Source: PubMed Central journal article supplement (PMC9120405)
Supplement: gutjnl-2021-326563supp001.pdf [file gutjnl-2021-326563supp001.pdf]

## Supplemental Information for

### **Gut microbiota composition is associated with SARS-CoV-2 vaccine immunogenicity and adverse events**

**This file includes:**

Supplementary methods

Supplementary figures 1 to 9

Supplementary tables 1 to 11

Supplementary references

#### **Supplementary methods**

##### **Serological tests**

For the SARS-CoV-2 surrogate virus neutralization test (sVNT), 10ul of plasma was diluted at 1:10 for CoronaVac and 1:200 for BNT162b2 and mixed with an equal volume of horseradish peroxidase (HRP) conjugated to SARS-CoV-2 spike receptor binding domain (RBD) (6 ng). After incubation for 30 min at 37°C, a 100-µl volume of each mixture was added to each well on the microtiter plate coated with ACE-2 receptor. The plate was sealed and incubated at room temperature for 15 min at 37°C. The plate was then washed with wash solution and 100µl of 3,3',5,5' - tetramethylbenzidine (TMB) solution was added to each well and incubated in the dark at room temperature for 15 min. The reaction was stopped by addition of 50 µl of Stop Solution to each well and the absorbance read at 450 nm in an ELISA microplate reader. The assay validity was based on values representing optical density at 450 nm (OD<sub>450</sub>) for positive and negative results falling within the range of recommended values. On the basis of the assumption that the positive and negative controls gave the recommended OD<sub>450</sub> values, percentage of inhibition of each plasma was calculated as follows: Inhibition (%) = (1 - sample OD value/negative-control OD value) x 100. Inhibition values of >20% are regarded as positive<sup>1,2</sup>.

For SARS-CoV-2 spike RBD IgG ELISA, 96-well plates (Nunc MaxiSorp; Thermo Fisher Scientific) were coated overnight with 100 ng per well of the purified recombinant RBD protein in phosphate-buffered saline (PBS) buffer. The plates were then blocked with 100 µl of ChonBlock blocking/sample dilution ELISA buffer (Chondrex Inc., Redmond, WA, USA) and incubated at room temperature for 2 h. Each plasma sample was tested from the dilution of 1:100 to 1:12800 in ChonBlock blocking/sample dilution ELISA buffer and added to the

ELISA wells of each plate for 2 h of incubation at 37°C. After extensive washing with PBS containing 0.1% Tween 20, horseradish peroxidase (HRP)-conjugated goat anti-human IgG (Thermo Fisher Scientific, Catalog No. A18805) (1:5,000) was added for 1 h at 37°C. The ELISA plates were then washed five times with PBS containing 0.1% Tween 20. Subsequently, 100 µl of HRP substrate (Ncm TMB One; New Cell and Molecular Biotech Co. Ltd., Suzhou, China) was added into each well. After 15 min of incubation, the reaction was stopped by adding 50 µl of 2 M H<sub>2</sub>SO<sub>4</sub> solution and analyzed on an absorbance microplate reader at 450-nm wavelength. The validation and optical density cut-off for a positive result were as described in the previous publication<sup>1,2</sup>. The area under the curve (AUC) of each sample was calculated by GraphPad software.

### **DNA extraction and sequencing library construction**

Fecal DNA was extracted from the pellet using Maxwell RSC PureFood GMO and Authentication Kit (Promega, Madison, WI). Briefly, the fecal pellet was added to 1 mL of CTAB buffer and vortexed for 30 seconds, then the sample was heated at 95°C for 5 minutes. After that, the samples were vortexed thoroughly with beads at maximum speed for 15 minutes. Then, 40 µL of proteinase K and 20 µL of RNase A was added to the sample and the mixture was incubated at 70°C for 10 minutes. The supernatant was then obtained by centrifuging at 13,000g for 5 minutes and was added into the Maxwell RSC machine for DNA extraction. Extracted DNA was subject to DNA libraries construction, completed through the processes of end repairing, adding A to tails, purification and PCR amplification, using Nextera DNA Flex Library Preparation kit (Illumina, San Diego, CA)<sup>3,4</sup>.

### **Sequence data processing and analysis**

Raw reads were quality filtered and trimmed using KneadData v0.10.0 with Trimmomatic v0.39 to remove adaptor and low-quality sequences (Parametersetting: “MINLEN:50 ILLUMINACLIP:TruSeq3-PE.fa:2:40:15 SLIDINGWINDOW:4:20”) and with Bowtie2 (Parameter settings: “--very-sensitive –dovetail”) to remove human host DNA by mapping reads onto human reference genome GRCh38. We acquired 2096.78 Gb high-quality pairedend reads for the 272 samples with an average of 7.71 Gb per sample. Following this, microbiota taxonomic compositions and functional potentials (including functional pathways and Gene Ontologies) were inferred from quality-filtered reads using MetaPhlAn (v3.0) and HUMAnN (v3.0), respectively, with default settings. Beta diversity (between-sample diversity) was calculated as Jensen-Shannon Divergence (JSD) index by the phyloseq and

vegan packages and visualized by non-metric multidimensional scaling (NMDS). Alpha diversity (within-sample diversity) indices, including observed species, Shannon and Simpson index, were calculated on the basis of the species profile for each sample. Gut microbial motility was calculated based on species relative abundance and motility phenotype (the GOLD database (v202109) and the International Journal of Systematic and Evolutionary Microbiology (IJSEM) database), per Guittar *et al*<sup>5</sup>.

### Statistical methods

Baseline characteristics and adverse events after the first and second dose of each vaccination group were compared using Fisher's exact test for the categorical variables and Wilcoxon rank-sum test for continuous variables. The comparisons of immunity markers between two types of vaccines were further adjusted for potential confounders such as age and comorbidities using adjusted linear regression and propensity score matching analysis. Pairwise multilevel comparisons among baseline and one-month samples of BNT162b2 and CoronaVac vaccinees were carried out on the JSD distance matrix using pairwise Adonis test. Associations between gut microbial community composition and patients' characteristics were assessed using permutational multivariate analysis of variance (PERMANOVA). Unsupervised clustering was conducted using the partitioning around medoids (PAM) clustering method based on the JSD distance matrix, and the number of clusters was determined according to the Calinski-Harabasz index, Silhouette coefficient and sample sizes. Paired Wilcoxon rank-sum tests (two-sides) were performed to compare the  $\alpha$ -diversity of baseline and one-month samples within each vaccine group. Differentially abundant species between groups/clusters were identified using the linear discriminant analysis effect size (LEfSe v1.1.01) (linear discriminant analysis (LDA) score > 2, and  $P < 0.05$ ). Correlations between continuous variables, including immune responses (sVNT%, spike RBD IgG level, species abundance and function abundance) were analyzed using Spearman's correlation tests, while the immune response differences amongst other binary/categorical variables were tested by Wilcoxon rank-sum tests. In the correlation analysis between the sVNT% and relative abundances of selected bacterial species markers, partial Spearman correlations were used to adjust for confounding factors. Generalized linear models (GLM) for binominal outcomes (high-responders versus low-responders or highest-tier responders vs others) with receiver operating characteristic (ROC) curve was applied to determine the prediction value of the identified biomarkers. GLMs were also constructed to investigate modification effects while adjusting for potential confounders identified in univariable

analysis. Mixed effect models were built to identify persistently differentially abundant species, using *lme* (of the nlme package) or *lme.zig* (of the NBZIMM package) that was optimized for zero-inflated microbiome data<sup>6</sup>, where appropriate. *P* values less than 0.05 were considered statistically significant. FDR corrected *P* values were generated in relevant statistical tests such as correlation analysis between selected bacterial species markers and correlation analysis between fimbriae/flagella-related gene ontology abundance and bacterial relative abundance in which multiple-testing was applicable. FDR correction was not applied in LEfSe analysis because it first detected potential bacteria markers by non-parametric factorial Kruskal-Wallis (KW) test and Wilcoxon sum-rank test followed by LDA of significantly differentially abundant markers<sup>7</sup>. Since LDA is a multivariable analysis, we did not adjust for *P* values<sup>8</sup>. Other analyses in which FDR correction was not applicable included binary analysis of demographics, correlation between two antibody markers and mixed modeling for longitudinal differential abundant of selected bacteria markers because they did not include multiple-testing and/or they were based on *a priori* hypotheses. All the analyses and data visualization were performed in R V4.0.3 with the following packages: phyloseq, vegan, tidyverse, dplyr, glm, ppcor, pairwise.adonis, pROC, NBZIMM, ggplot2, ggpubr, ComplexHeatmap, circlize and Hmisc.

## Supplementary figures

**Supplementary Figure 1. Immune response against SARS-CoV-2 in the study cohort. a,** sVNT level (%) to SARS-CoV-2 (10-fold dilution) at baseline and at one month after second dose of vaccination for CoronaVac (n = 37) and BNT162b2 (n = 101). Dashed line indicates sVNT = 60%. *P* values were given by paired Wilcoxon rank-sum test (two-sided). **b,** spike RBD IgG titre (AUC) at baseline and at one month after second dose of vaccination for CoronaVac (n = 37) and BNT162b2 (n = 101). *P* values were given by Wilcoxon rank-sum test (two-sided). **c,** Correlation between sVNT-10 (%) and spike RBD IgG titre at one month in CoronaVac vaccinees (n = 37). **d,** Correlation between sVNT-200 (%) and spike RBD IgG titre at one month in BNT162b2 vaccinees (n = 101). **e,** sVNT-200 (%) at one month after second dose of vaccination in BNT162b2 vaccinees (n = 101). sVNT-10: sVNT level of 10-fold diluted plasma; sVNT-200: sVNT level of 200-fold diluted plasma. Elements on dot plots: center line, median; whiskers, 1.5x interquartile range; points, outliers. Correlation between sVNT data and spike RBD IgG titre (AUC) were examined using Spearman's correlation test. Regression lines with 95% CI (shaded area) were shown on scatter plots.

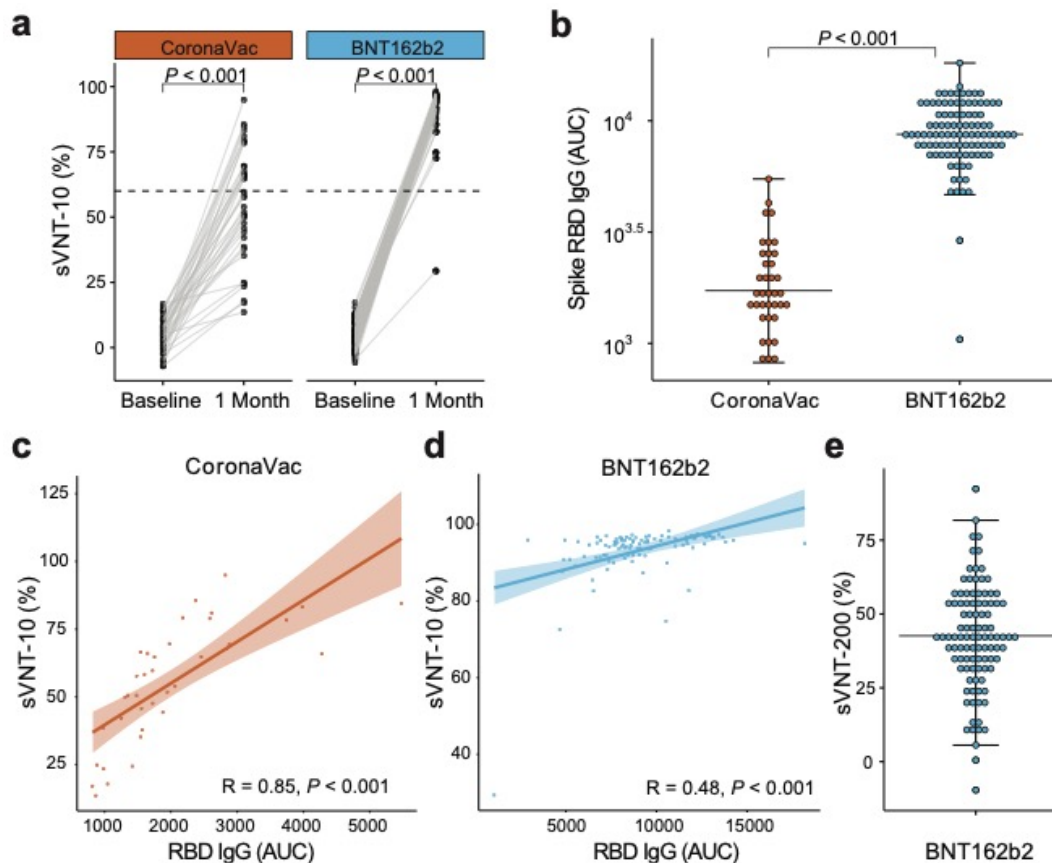

**Supplementary Figure 2. Gut microbiota species at one month after second dose of vaccination enriched in high-responders.** **a**, Gut bacterial species encirched in high-responders of CoronaVac vaccine (n = 36). **b**, Gut bacterial species encirched in high-responders of BNT162b2 vaccine (n = 98). Differential gut bacterial species were detected by LEfSe. sVNT-10: sVNT level of 10-fold diluted plasma; sVNT-200: sVNT level of 200-fold diluted plasma.

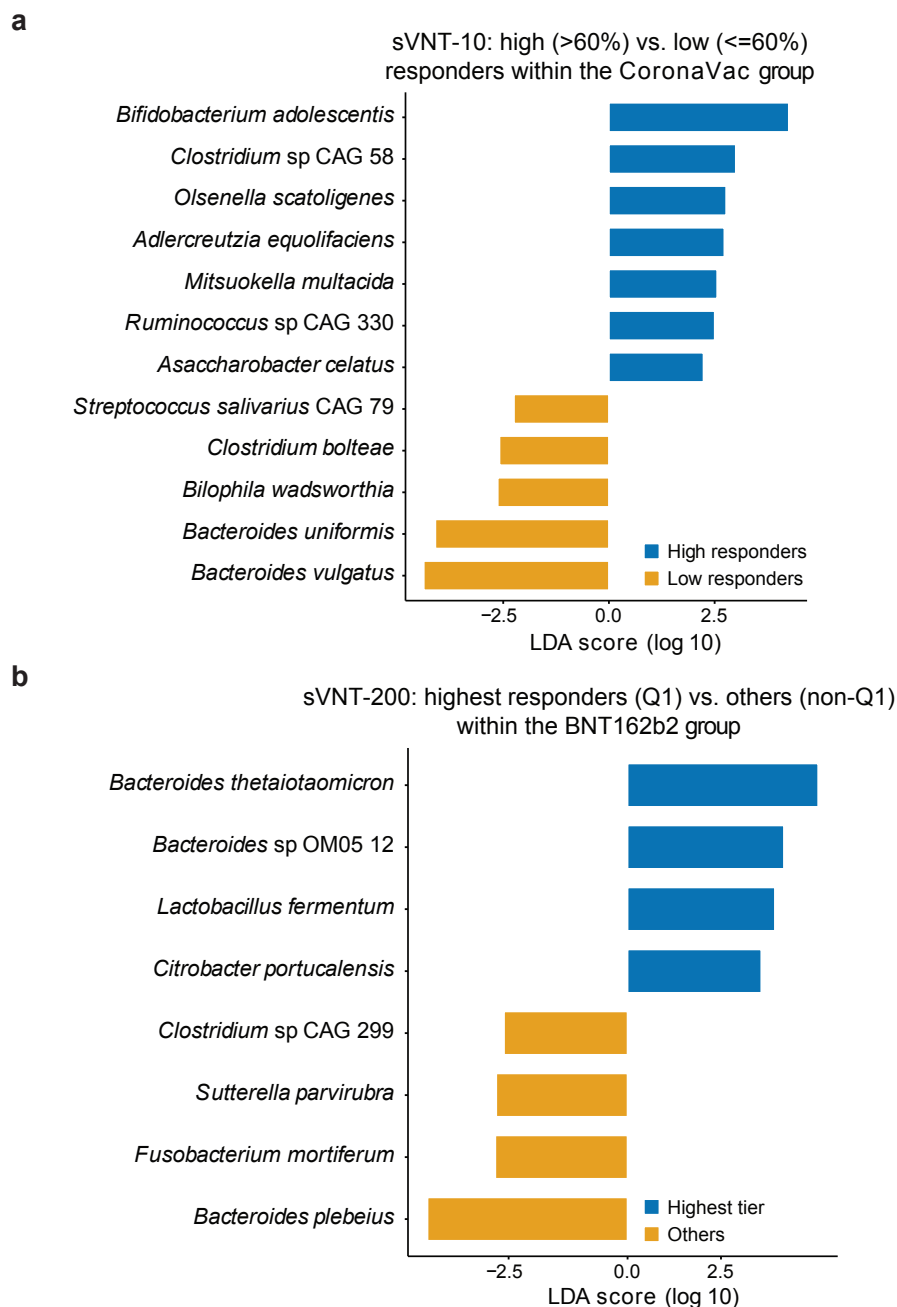

**Supplementary Figure 3.** Gut microbiota dysbiosis in the subject with very low level of sVNT (10-fold dilution) against BNT162b2 vaccine at **a**, phylum and **b**, species levels. Inner and outer circles in **a** represent BNT162b2 low-responder and others (n = 100), respectively.

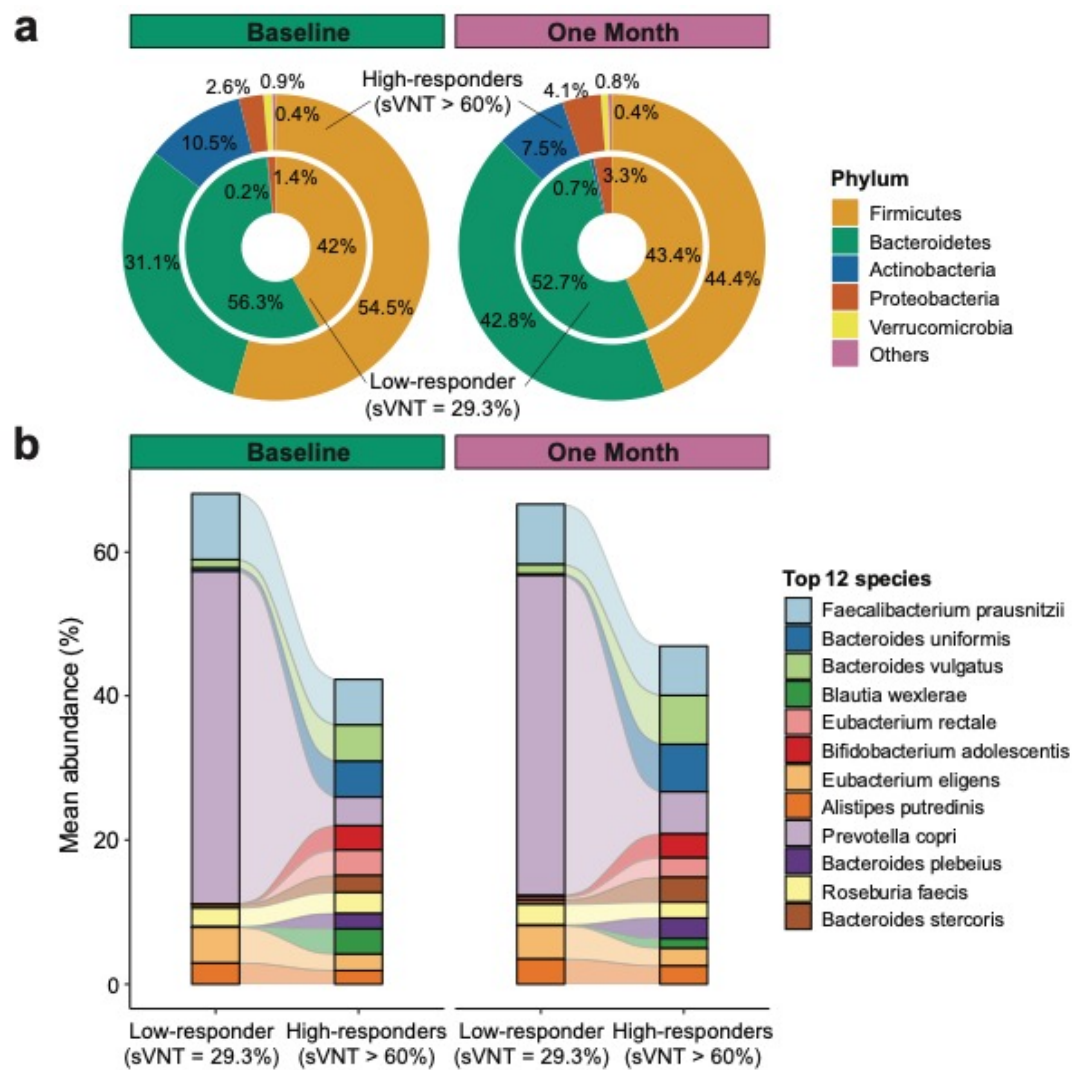



**Supplementary Figure 4.** Heatmap showing relative abundance of contributing species to gut bacterial motility of the baseline gut microbiome in BNT162b2 vaccinees (N = 101). FDR corrected *P* value of Spearman correlations: \*\*\*, *P* < 0.001; \*\*, *P* < 0.01; \*, *P* < 0.05.

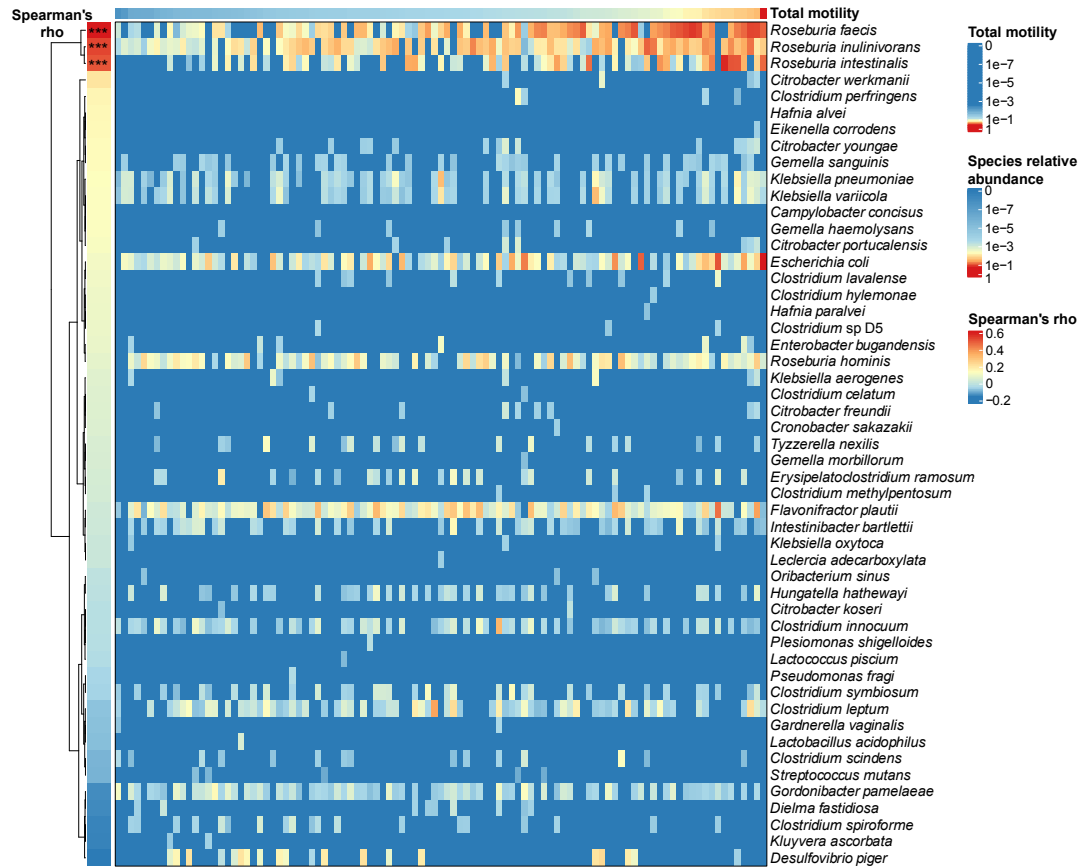



**Supplementary Figure 5.** Heatmap showing relative abundance of species significantly correlated with bacterial-type flagellum-dependent cell motility (GO:0071973) of the baseline gut microbiome in BNT162b2 vaccinees (n = 101). FDR corrected *P* value of Spearman correlations: \*\*\*, *P* < 0.001; \*\*, *P* < 0.01; \*, *P* < 0.05.

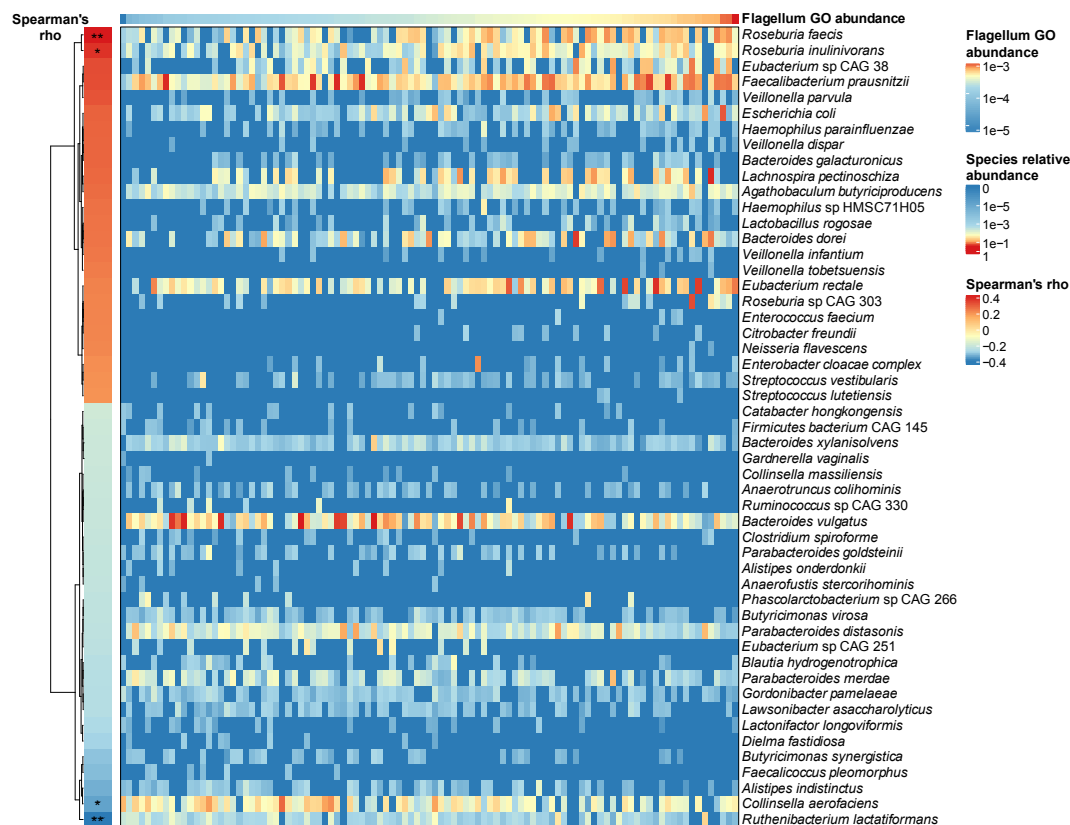

**Supplementary Figure 6.** Heatmap showing relative abundance of species significantly correlated with bacterial fimbriae (GO:0009289) of the baseline gut microbiome in BNT162b2 vaccinees (n = 101). FDR corrected *P* value of Spearman correlations: \*\*\*, *P* < 0.001; \*\*, *P* < 0.01; \*, *P* < 0.05.

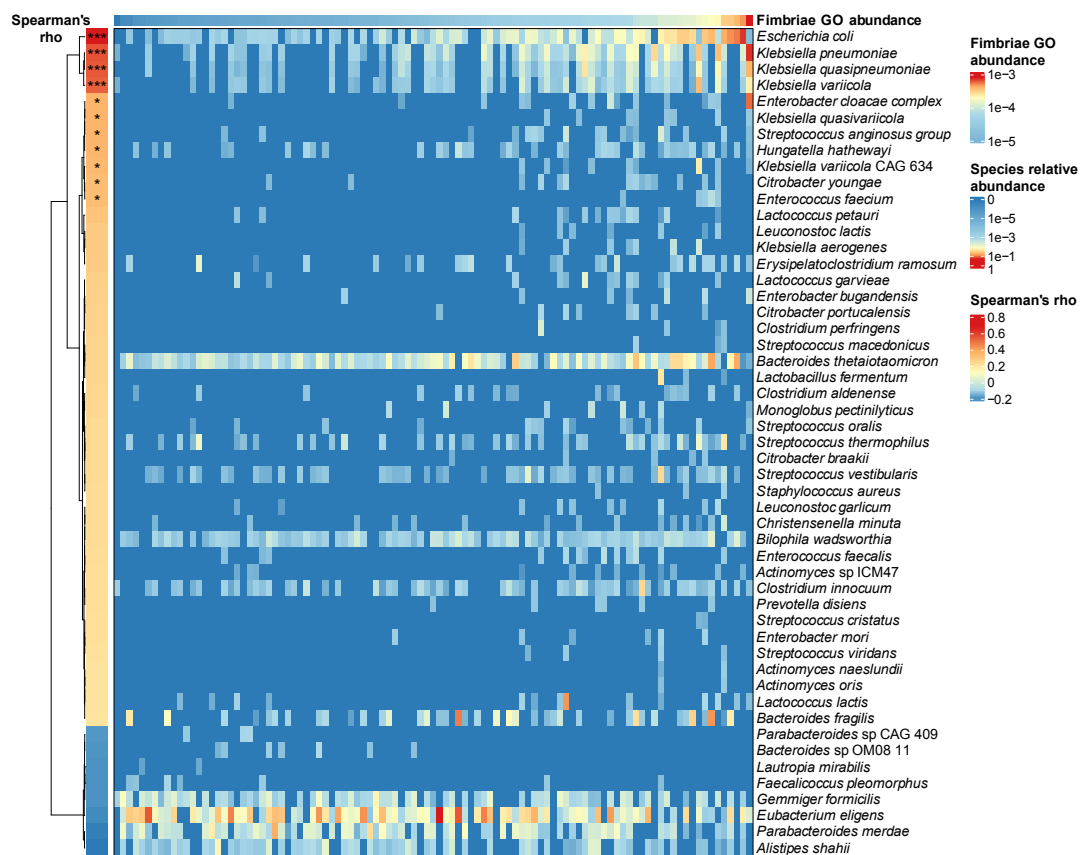

**Supplementary Figure 7.** Baseline gut bacterial species enriched in high-responders (n = 4) vs. low-responders (n = 11) of CoronaVac vaccine with BMI  $\geq$  23. Differential gut bacterial species were detected by LEfSe. sVNT-10: sVNT of 10-fold diluted plasma.

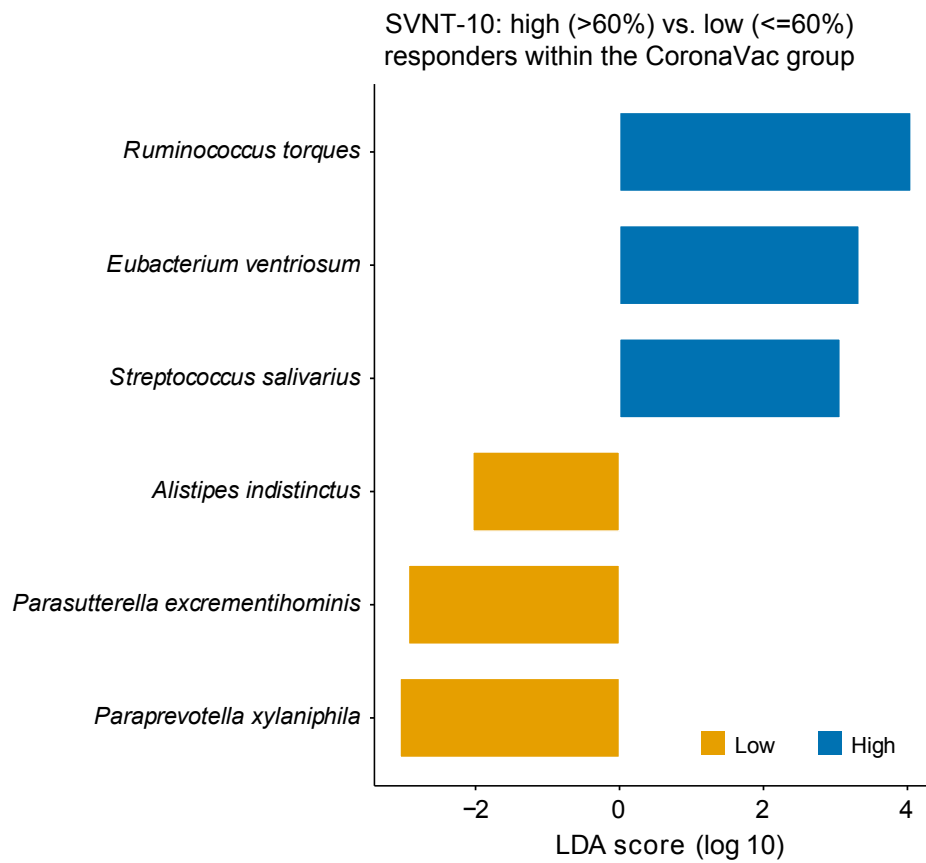

**Supplementary Figure 8.** Normalized proportion change of observed species between the baseline and one month after second dose of BNT162b2 is associated with adverse events after the first dose. Number of participants experienced adverse events after the first vaccine dose: Yes, 90; No, 7.

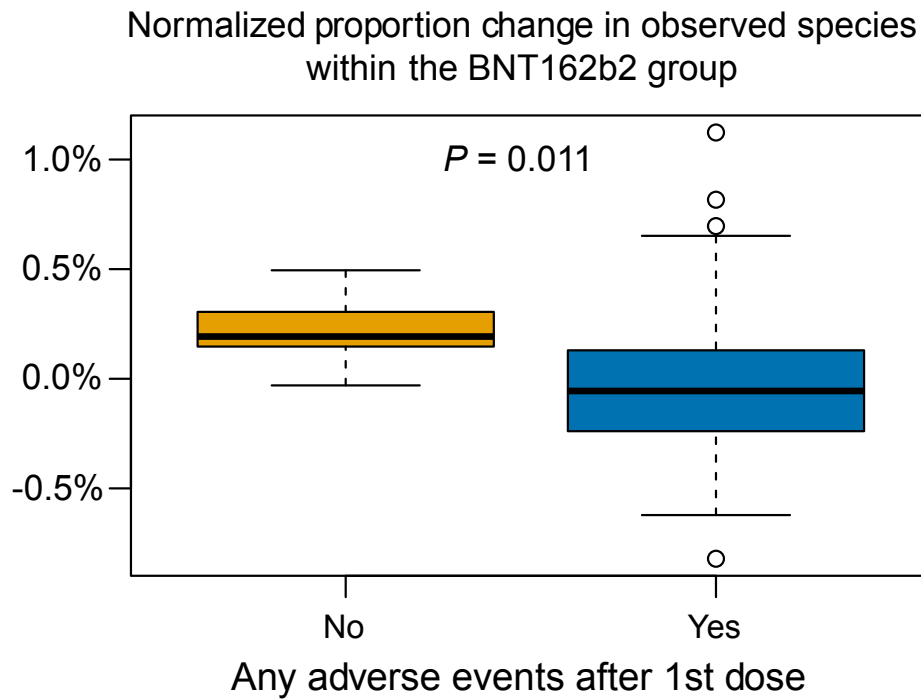

**Supplementary Figure 9. Clustering of baseline gut microbiome samples.** **a**, Calinski-Harabasz index of clustering in CoronaVac vaccinees. **b**, Average silhouette width of clustering in CoronaVac vaccinees (n = 37). **c**, Two clusters of CoronaVac vaccinees (Cluster 1, n = 10; Cluster 2, n = 27). **d**, Bacterial species associated with different gut microbiota clusters of CoronaVac vaccinees. **e**, Calinski-Harabasz index of clustering in BNT162b2 vaccinees (n = 101). **f**, Average silhouette width of clustering in BNT162b2 vaccinees. **g**, Two clusters of CoronaVac vaccinees (Cluster 1, n = 20; Cluster 2, n = 81). **h**, Bacterial species associated with different gut microbiota clusters of BNT162b2 vaccinees. Clustering was based on JSD dissimilarity. Differential gut bacterial species were identified using LefSe.

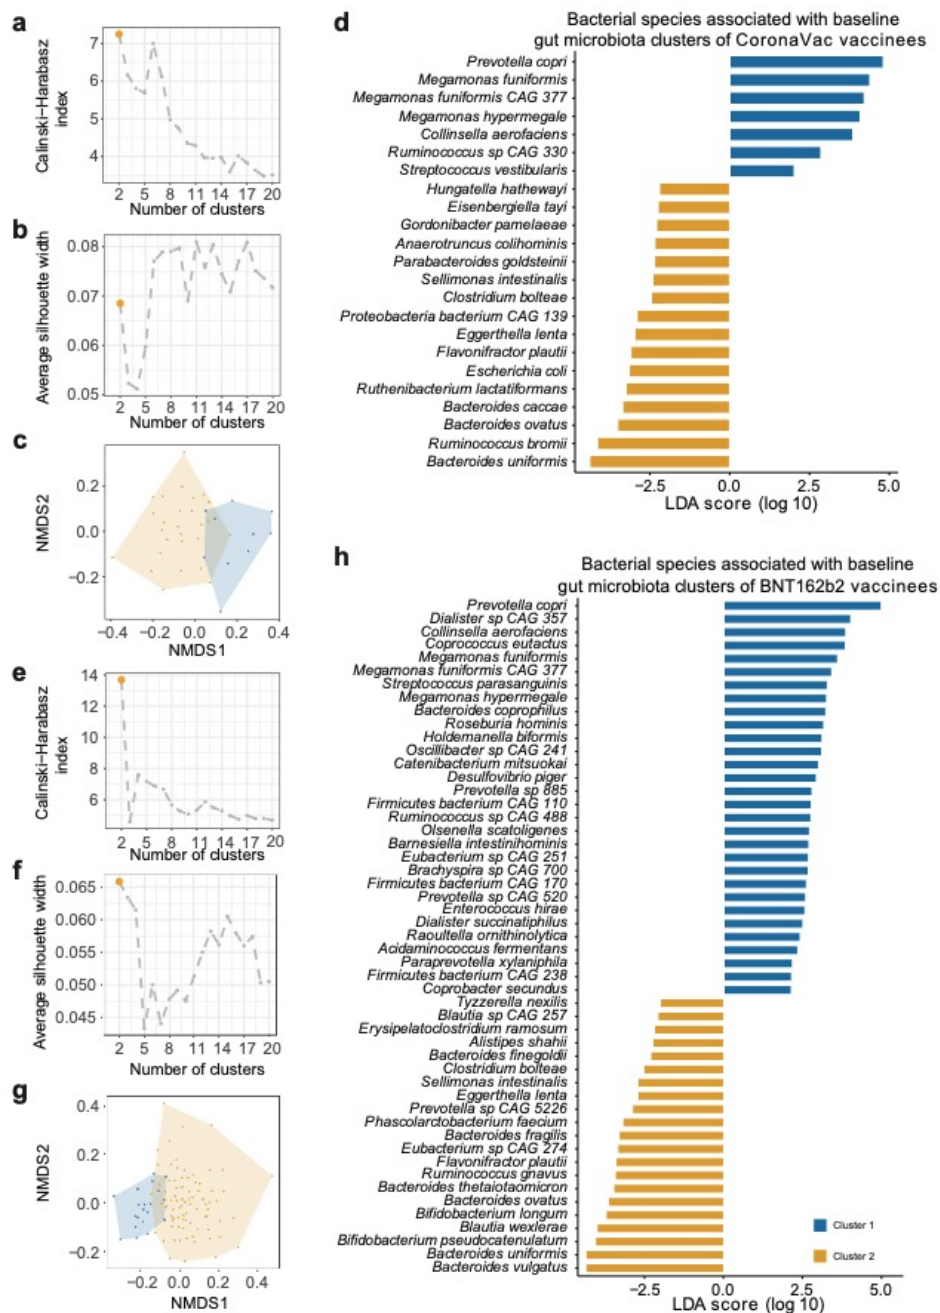

## Supplementary tables

Supplementary Table 1. Adverse events after first dose and second dose of vaccination

| Adverse events                                          | After 1st dose   |                  |                 | After 2nd dose   |                  |                 |
|---------------------------------------------------------|------------------|------------------|-----------------|------------------|------------------|-----------------|
|                                                         | BNT162b2 (N=101) | CoronaVac (N=37) | <i>p</i> -value | BNT162b2 (N=101) | CoronaVac (N=37) | <i>p</i> -value |
| Injection site pain/burn                                | 84 (84.0)        | 17 (45.9)        | <0.001          | 79 (79.0)        | 16 (43.2)        | <0.001          |
| Fatigue                                                 | 33 (33.0)        | 3 (8.1)          | 0.004           | 49 (49.0)        | 6 (16.2)         | <0.001          |
| Fever                                                   | 6 (6.0)          | 1 (2.7)          | 0.674           | 27 (27.0)        | 0 (0.0)          | <0.001          |
| Injection site swelling, pruritus, erythema, induration | 26 (26.0)        | 1 (2.7)          | 0.001           | 28 (28.0)        | 6 (16.2)         | 0.186           |
| Myalgia                                                 | 22 (22.0)        | 2 (5.4)          | 0.023           | 26 (26.0)        | 2 (5.4)          | 0.008           |
| Drowsiness                                              | 17 (17.0)        | 3 (8.1)          | 0.277           | 20 (20.0)        | 2 (5.4)          | 0.039           |
| Headache                                                | 11 (11.0)        | 1 (2.7)          | 0.180           | 25 (25.0)        | 0 (0.0)          | <0.001          |
| Chills                                                  | 3 (3.0)          | 0 (0.0)          | 0.563           | 15 (15.0)        | 1 (2.7)          | 0.069           |
| Dizziness                                               | 6 (6.0)          | 1 (2.7)          | 0.674           | 12 (12.0)        | 1 (2.7)          | 0.185           |
| Arthralgia                                              | 4 (4.0)          | 0 (0.0)          | 0.574           | 10 (10.0)        | 0 (0.0)          | 0.062           |
| Loss of appetite                                        | 2 (2.0)          | 1 (2.7)          | 1.000           | 7 (7.0)          | 0 (0.0)          | 0.189           |
| Abdominal pain                                          | 1 (1.0)          | 0 (0.0)          | 1.000           | 6 (6.0)          | 0 (0.0)          | 0.190           |
| Rhinorrhea                                              | 1 (1.0)          | 1 (2.7)          | 0.469           | 5 (5.0)          | 2 (5.4)          | 1.000           |
| Sore throat                                             | 1 (1.0)          | 0 (0.0)          | 1.000           | 6 (6.0)          | 0 (0.0)          | 0.190           |
| Diarrhea                                                | 2 (2.0)          | 1 (2.7)          | 1.000           | 5 (5.0)          | 1 (2.7)          | 1.000           |
| Pruritus                                                | 3 (3.0)          | 2 (5.4)          | 0.612           | 4 (4.0)          | 2 (5.4)          | 0.661           |
| Coughing                                                | 1 (1.0)          | 0 (0.0)          | 1.000           | 4 (4.0)          | 0 (0.0)          | 0.574           |
| Constipation                                            | 0 (0.0)          | 0 (0.0)          | -               | 3 (3.0)          | 0 (0.0)          | 0.563           |
| Abdominal distension                                    | 0 (0.0)          | 0 (0.0)          | -               | 3 (3.0)          | 0 (0.0)          | 0.563           |
| Nausea                                                  | 1 (1.0)          | 0 (0.0)          | 1.000           | 3 (3.0)          | 0 (0.0)          | 0.563           |
| Flushing                                                | 1 (1.0)          | 0 (0.0)          | 1.000           | 2 (2.0)          | 0 (0.0)          | 1.000           |
| Hypersensitivity                                        | 1 (1.0)          | 0 (0.0)          | 1.000           | 1 (1.0)          | 1 (2.7)          | 0.469           |
| Muscle spasms                                           | 1 (1.0)          | 0 (0.0)          | 1.000           | 1 (1.0)          | 1 (2.7)          | 0.469           |
| Nasal Congestion                                        | 0 (0.0)          | 0 (0.0)          | -               | 2 (2.0)          | 0 (0.0)          | 1.000           |
| Edema                                                   | 0 (0.0)          | 0 (0.0)          | -               | 1 (1.0)          | 0 (0.0)          | 1.000           |
| Vomiting                                                | 0 (0.0)          | 0 (0.0)          | -               | 0 (0.0)          | 0 (0.0)          | -               |
| Tremor                                                  | 0 (0.0)          | 0 (0.0)          | -               | 0 (0.0)          | 0 (0.0)          | -               |
| Eyelid edema                                            | 0 (0.0)          | 0 (0.0)          | -               | 0 (0.0)          | 0 (0.0)          | -               |
| Nosebleeds                                              | 0 (0.0)          | 0 (0.0)          | -               | 1 (1.0)          | 0 (0.0)          | 1.000           |

|                                   |           |           |                  |           |           |                  |
|-----------------------------------|-----------|-----------|------------------|-----------|-----------|------------------|
| Hyposmia                          | 0 (0.0)   | 0 (0.0)   | -                | 0 (0.0)   | 0 (0.0)   | -                |
| Ocular congestion                 | 1 (1.0)   | 0 (0.0)   | 1.000            | 0 (0.0)   | 0 (0.0)   |                  |
| Others <sup>1</sup>               | 12 (12.0) | 1 (2.70)  | 0.185            | 15 (15.0) | 1 (2.70)  | 0.069            |
| Number of adverse events (listed) |           |           | <b>&lt;0.001</b> |           |           | <b>&lt;0.001</b> |
| 0                                 | 7 (7.0)   | 14 (37.8) |                  | 5 (5.0)   | 12 (32.4) |                  |
| 1                                 | 39 (39.0) | 16 (43.2) |                  | 22 (22.0) | 15 (40.5) |                  |
| 2                                 | 21 (21.0) | 4 (10.8)  |                  | 19 (19.0) | 5 (13.5)  |                  |
| ≥3                                | 33 (33.0) | 3 (8.11)  |                  | 54 (54.0) | 5 (13.5)  |                  |
| Any adverse events                | 93 (93.0) | 23 (62.2) | <b>&lt;0.001</b> | 95 (95.0) | 25 (67.6) | <b>&lt;0.001</b> |

Data are n (%). Within group valid percentages are shown. There is one missing data in BNT162b2 group. 1. Others include low back pain, increase of appetite, muscle pain, rib pain, eyes pain, palpitations.



**Supplementary Table 2. Linear regression model for immunity response between two vaccine groups**

| Variables            | Unadjusted |       |         | Adjusted* |       |         |
|----------------------|------------|-------|---------|-----------|-------|---------|
|                      | $\beta$    | SE    | P value | $\beta$   | SE    | P value |
| AUC of spike RBD IgG |            |       |         |           |       |         |
| BNT162b2             | Ref        | Ref   | Ref     | Ref       | Ref   | Ref     |
| CoronaVac            | -7088.5    | 451.3 | <0.001  | -7098.6   | 464.3 | <0.001  |
| sVNT (inhibition %)  |            |       |         |           |       |         |
| BNT162b2             | Ref        | Ref   | Ref     | Ref       | Ref   | Ref     |
| CoronaVac            | -38.0      | 2.5   | <0.001  | -36.2     | 2.5   | <0.001  |

$\beta$ , Standardized regression coefficient. sVNT (inhibition %), sVNT level of 10-fold diluted plasma.

\*Adjusted for age and comorbidities.

**Supplementary Table 3. Immunity response in propensity score matched vaccine groups**

| Variables            | Overall (N=105)         | BNT162b2 (N=69)          | CoronaVac (N=36)        | P Value |
|----------------------|-------------------------|--------------------------|-------------------------|---------|
| AUC of spike RBD IgG | 7688.0 (2416.0, 9311.5) | 8696.0 (7710.0, 10598.5) | 1726.0 (1401.8, 2491.0) | <0.001  |
| sVNT (inhibition %)  | 93.7 (68.5, 95.8)       | 95.4 (93.6, 96.4)        | 57.9 (43.7, 69.4)       | <0.001  |

The data are presented as median (Interquartile range). Matching is based on propensity scores incorporating age and comorbidity.

Supplementary Table 4. Association between participant demographics and immune response

| Variables                           | BNT162b2 (N=101)            |              |                     |         | CoronaVac (N=37)           |         |                     |              |
|-------------------------------------|-----------------------------|--------------|---------------------|---------|----------------------------|---------|---------------------|--------------|
|                                     | AUC of spike RBD IgG        | P value      | sVNT-200            | P value | AUC of spikeRBD IgG        | P value | sVNT-10             | P value      |
| <b>Characteristic</b>               |                             |              |                     |         |                            |         |                     |              |
| Age                                 | -0.016                      | 0.872        | 0.064               | 0.525   | -0.241                     | 0.151   | -0.294              | 0.077        |
| Gender                              |                             | 0.131        |                     | 0.871   |                            | 0.768   |                     | 0.821        |
| Female                              | 9109.0 (7775.0, 11627.0)    |              | 42.6 (30.0, 56.2)   |         | 1687.5 (1450.5, 2535.0)    |         | 55.7 (43.9, 66.9)   |              |
| Male                                | 8422.0 (6798.0, 10024.0)    |              | 42.9 (35.1, 49.3)   |         | 1878.0 (1046.0, 2181.0)    |         | 66.5 (38.6, 78.9)   |              |
| Body mass index                     | -0.136                      | 0.176        | -0.015              | 0.880   | -0.305                     | 0.066   | -0.385              | <b>0.018</b> |
| Overweight/Obese                    |                             | 0.074        |                     | 0.577   |                            | 0.080   |                     | 0.069        |
| No                                  | 9233.0 (7846.0, 11627.0)    |              | 42.7 (31.1, 56.2)   |         | 1739.0 (1486.0, 2835.0)    |         | 65.3 (42.1, 78.9)   |              |
| Yes                                 | 8330.0 (7203.0, 9266.0)     |              | 41.2 (33.1, 52.2)   |         | 1558.0 (1179.5, 1962.5)    |         | 49.9 (41.4, 59.3)   |              |
| Obese                               |                             | <b>0.033</b> |                     | 0.644   |                            | 0.128   |                     | 0.140        |
| No                                  | 9089.0 (7775.0, 11445.0)    |              | 40.9 (33.1, 53.9)   |         | 1739.0 (1450.5, 2599.0)    |         | 59.0 (43.9, 74.0)   |              |
| Yes                                 | 7832.5 (6894.0, 8659.0)     |              | 44.0 (29.9, 54.5)   |         | 1541.0 (979.5, 1727.0)     |         | 44.3 (38.6, 47.6)   |              |
| <b>Comorbidities</b>                |                             |              |                     |         |                            |         |                     |              |
| Hypertension                        |                             | 0.663        |                     | 0.683   |                            | 0.608   |                     | 0.954        |
| No                                  | 8701.5 (7675.0, 11048.0)    |              | 42.7 (33.3, 53.9)   |         | 1627.0 (1353.0, 2459.0)    |         | 57.9 (38.6, 67.7)   |              |
| Yes                                 | 8538.0 (6843.5, 10921.5)    |              | 29.9 (23.9, 63.3)   |         | 1878.0 (1642.5, 2384)      |         | 47.6 (45, 78.6)     |              |
| Diabetes mellitus                   |                             | 0.652        |                     | 0.803   |                            | -       |                     | -            |
| No                                  | 8677.5 ( 7639.8 , 10958.7)  |              | 42.7 ( 31.6, 54.2 ) |         | 1725.0 (1450.5, 2416.0)    |         | 57.9 (43.2, 69.5)   |              |
| Yes                                 | 10530.0 ( 8866.5 , 11263.5) |              | 39.5 (36.4, 52.9)   |         | NA                         |         | NA                  |              |
| Allergy ever                        |                             | 0.262        |                     | 0.301   |                            | 0.638   |                     | 0.768        |
| No                                  | 9062.0 (7754.0 , 11627.0)   |              | 42.6 (33.2, 56.4)   |         | 1627.0 (1450.5, 2416.0)    |         | 55.7 (36.5, 69.5)   |              |
| Yes                                 | 8657.5 (7245.8 , 9999.7)    |              | 41.9 (29.3, 51.2)   |         | 1753.0 (1353.0, 2611.0)    |         | 59.7 (44.3, 65.9)   |              |
| Diarrhoea (past 3 month to current) |                             | 0.992        |                     | 0.175   |                            | 0.558   |                     | 1.000        |
| No                                  | 8616.0 ( 7699.0 , 10322.7 ) |              | 40.9 ( 29.9, 51.7 ) |         | 1725.0 (1450.5, 2523.0)    |         | 53.8 ( 38.1, 68.5 ) |              |
| Yes                                 | 8785.0 ( 7124.0 , 11609.3 ) |              | 43.2 (35.9, 56.1 )  |         | 1604.0 (1486.0,1878.0)     |         | 57.6 ( 45.6, 66.5 ) |              |
| Other comorbidities                 |                             | 0.258        |                     | 0.663   |                            | 0.676   |                     | 0.300        |
| No                                  | 8777.0 (7651.5, 11251.5)    |              | 42.7 (31.6, 54.4)   |         | 1725.0 ( 1450.5, 2523.0 )  |         | 58.3 ( 43.2, 69.5 ) |              |
| Yes                                 | 8084.0 (7405.0, 9069.0)     |              | 39.4 (33.3, 52.6)   |         | 1555.0 ( 1300.5 , 1809.5 ) |         | 35.8 ( 26.9, 44.9)  |              |

**Supplementary Table 4. Association between participant demographics and immune response**

| Variables                                                | BNT162b2 (N=101)         |         |                   |         | CoronaVac (N=37)          |         |                   |         |
|----------------------------------------------------------|--------------------------|---------|-------------------|---------|---------------------------|---------|-------------------|---------|
|                                                          | AUC of spike RBD IgG     | P value | sVNT-200          | P value | AUC of spikeRBD IgG       | P value | sVNT-10           | P value |
| <b>Current medication</b>                                |                          |         |                   |         |                           |         |                   |         |
| Antibiotic intake (within 3 month and up to vaccination) |                          | 0.477   |                   | 0.994   |                           | -       |                   | -       |
| No                                                       | 8659.0 (7398.0, 10869.5) |         | 42.9 (32.1, 54.1) |         | 1687.5 (1385.5, 2416.0)   |         | 55.7 (40.4, 68.5) |         |
| Yes                                                      | 9331.0 (8162.0, 11058.0) |         | 39.5 (37.9, 56.2) |         | NA                        |         | NA                |         |
| Hormonal therapy                                         |                          | 0.207   |                   | 0.503   |                           | -       |                   | -       |
| No                                                       | 8696.0 (7675.0, 11058.0) |         | 42.6 (33.3, 54.4) |         | 1725.0 (1418.0, 2459.0)   |         | 57.6 (42.1, 69.3) |         |
| Yes                                                      | 7808.5 (3968.5, 8954.5)  |         | 32.8 (11.5, 54.2) |         | NA                        |         | NA                |         |
| Immunotherapy                                            |                          | 0.226   |                   | 0.153   |                           | -       |                   | -       |
| No                                                       | 8701.5 (7628.0, 11058.0) |         | 42.7 (33.3, 54.5) |         | 1725.0 (1418, 2459)       |         | 57.6 (42.1, 69.3) |         |
| Yes                                                      | 8084.0 (4563.5, 8403.5)  |         | 31.1 (15.8, 37.1) |         | NA                        |         | NA                |         |
| Probiotics                                               |                          | 0.507   |                   | 0.221   |                           | 0.532   |                   | 0.587   |
| No                                                       | 8683.0 (7398.0, 10679.0) |         | 41.1 (29.9, 54.2) |         | 1753.0 (1450.5, 2523.0)   |         | 57.6 (41.4, 74.0) |         |
| Yes                                                      | 8676.0 (8215.5, 12360.5) |         | 51.2 (37.0, 53.4) |         | 1574.0 (1353.0, 1725.0)   |         | 54.4 (42.1, 59.7) |         |
| <b>Vaccination in the past year</b>                      |                          | 0.144   |                   | 0.222   |                           | 0.795   |                   | 0.795   |
| No                                                       | 8894.5 (7675.0, 11627.0) |         | 43.6 (33.3, 53.9) |         | 1687.5 (1418.0, 2459.0)   |         | 55.7 (38.6, 69.3) |         |
| Yes                                                      | 8297.0 (7230.0, 9511.0)  |         | 39.3 (29.9, 54.5) |         | 1727.0 ( 1385.5, 2480.0 ) |         | 64.7 (57.7, 72.9) |         |
| <b>Dietary habit</b>                                     |                          |         |                   |         |                           |         |                   |         |
| Vegetarian                                               |                          | -       |                   | -       |                           | -       |                   | -       |
| No                                                       | 8659.0 (7516.5, 10869.5) |         | 42.6 (33.2, 54.4) |         | 1725.0 (1418.0, 2459.0)   |         | 57.6 (42.1, 69.3) |         |
| Yes                                                      | NA                       |         | NA                |         | NA                        |         | NA                |         |
| Dietary change during vaccination                        |                          | -       |                   | -       |                           | -       |                   | -       |
| No                                                       | 8696.0 (7651.5, 10869.5) |         | 42.6 (33.2, 54.4) |         | 1725.0 (1418.0, 2459.0)   |         | 57.6 (42.1, 69.3) |         |
| Yes                                                      | NA                       |         | NA                |         | NA                        |         | NA                |         |
| Alcohol intake (within 2 weeks of vaccination)           |                          | 0.213   |                   | 0.266   |                           | 0.066   |                   | 0.481   |
| No                                                       | 8556.5 (7344.5, 10679.0) |         | 41.1 (32.1, 53.5) |         | 1650.0 (1333.0, 2277.0)   |         | 51.8 (40.4, 68.7) |         |

**Supplementary Table 4. Association between participant demographics and immune response**

| Variables                                   | BNT162b2 (N=101)         |         |                   |         | CoronaVac (N=37)        |         |                   |         |
|---------------------------------------------|--------------------------|---------|-------------------|---------|-------------------------|---------|-------------------|---------|
|                                             | AUC of spike RBD IgG     | P value | sVNT-200          | P value | AUC of spikeRBD IgG     | P value | sVNT-10           | P value |
| Yes                                         | 9357.0 (8067.0, 11899.0) |         | 44.9 (35.7, 56.2) |         | 2471.5 (1568.0, 4274.0) |         | 61.8 (53.8, 69.3) |         |
| <b>Exercise</b>                             |                          |         |                   |         |                         |         |                   |         |
| Regular exercise (Strenuous / moderate)     |                          | 0.942   |                   | 0.197   |                         | 0.404   |                   | 0.422   |
| No                                          | 8723.0 (7344.5, 10626.5) |         | 41.0 (29.3, 51.6) |         | 1313.0 (979.5, 2879.0)  |         | 49.9 (24.9, 69.3) |         |
| Yes                                         | 8677.5 (7675.0, 11445.0) |         | 43.2 (33.3, 54.5) |         | 1740.0 (1542.5, 2277.0) |         | 57.9 (46.6, 68.7) |         |
| <b>Any adverse events after vaccination</b> |                          |         |                   |         |                         |         |                   |         |
| After first dose                            |                          | 0.995   |                   | 0.112   |                         | 0.243   |                   | 0.298   |
| No                                          | 9062.0 (7810.5, 10699.5) |         | 39.0 (24.1, 41.7) |         | 1895.5 (1541, 2587.0)   |         | 65.3 (50.6, 67.7) |         |
| Yes                                         | 8659.0 (7405.0, 11048.0) |         | 43.1 (33.3, 54.5) |         | 1604.0 (1150, 2175.0)   |         | 51.8 (36.9, 69.5) |         |
| After second dose                           |                          | 0.121   |                   | 0.887   |                         | 0.737   |                   | 0.835   |
| No                                          | 9701.0 (9062.0, 12659.0) |         | 44.1 (39.3, 46.4) |         | 1634.0 (1385.5, 2325.5) |         | 52.2 (48.7, 72.7) |         |
| Yes                                         | 8656.0 (7398.0, 10869.5) |         | 42.6 (33.2, 54.4) |         | 1725.0 (1486, 2459)     |         | 58.3 (38.6, 69.3) |         |

sVNT-10: sVNT level of 10-fold diluted plasma; sVNT-200: sVNT level of 200-fold diluted plasma. Data are correlation coefficient or median (IQR). NA, Not applicable.

Supplementary Table 5. Factors influencing the baseline gut microbiome of the participants

| Variables                                                   | Df | SumsOfSqs   | MeanSqs     | F.Model     | R <sup>2</sup> | P value |
|-------------------------------------------------------------|----|-------------|-------------|-------------|----------------|---------|
| Vaccine groups                                              | 1  | 0.17335307  | 0.17335307  | 0.862931074 | 0.006305075    | 0.694   |
| Gender                                                      | 1  | 0.208147283 | 0.208147283 | 1.037007829 | 0.007622983    | 0.361   |
| OWOB                                                        | 1  | 0.231733764 | 0.231733764 | 1.154453596 | 0.008479       | 0.219   |
| Obese                                                       | 1  | 0.23754336  | 0.23754336  | 1.183649662 | 0.00869157     | 0.201   |
| Active Hypertension currently                               | 1  | 0.204290565 | 0.204290565 | 1.018087121 | 0.007430312    | 0.4     |
| DM currently                                                | 1  | 0.176532299 | 0.176532299 | 0.878859166 | 0.006420708    | 0.66    |
| Allergy ever                                                | 1  | 0.22353908  | 0.22353908  | 1.114798878 | 0.008130405    | 0.292   |
| Diarrhea (in the past 3 month and at the moment)            | 1  | 0.322621815 | 0.322621815 | 1.614701367 | 0.011906536    | 0.017   |
| Any other comorbidities                                     | 1  | 0.281072633 | 0.281072633 | 1.404684645 | 0.010222975    | 0.036   |
| Antibiotic intake past 3 month and/or currently             | 1  | 0.284561175 | 0.284561175 | 1.422301262 | 0.010349858    | 0.046   |
| Hormone intake currently                                    | 1  | 0.220665006 | 0.220665006 | 1.100349782 | 0.008025871    | 0.269   |
| Immune drug intake currently                                | 1  | 0.175480944 | 0.175480944 | 0.873591419 | 0.006382469    | 0.668   |
| Probiotic intake currently                                  | 1  | 0.225624018 | 0.225624018 | 1.125538182 | 0.008268384    | 0.252   |
| Vaccination in the past year                                | 1  | 0.113797724 | 0.113797724 | 0.564462045 | 0.004163791    | 0.998   |
| Dietary habit                                               | 1  | 0.156880744 | 0.156880744 | 0.77939718  | 0.005740173    | 0.878   |
| Alcohol intake (within 2 weeks prior to first vaccine dose) | 1  | 0.238828656 | 0.238828656 | 1.191716793 | 0.008686507    | 0.172   |
| Regular exercise (strenuous /moderate)                      | 1  | 0.318259492 | 0.318259492 | 1.592705609 | 0.011575509    | 0.017   |
| sVNT-200 Q1 (within BNT162b2 vaccinees)                     | 1  | 0.2329584   | 0.2329584   | 1.143064175 | 0.011414312    | 0.246   |
| sVNT-10 >60% (within CoronaVac vaccinees)                   | 1  | 0.254442111 | 0.254442111 | 1.337742476 | 0.036814133    | 0.091   |
| AE after the first dose                                     | 1  | 0.421510761 | 0.421510761 | 2.121512258 | 0.015471768    | 0.002   |
| AE after the second dose                                    | 1  | 0.201213828 | 0.201213828 | 1.004482396 | 0.007385657    | 0.46    |
| No. of AE after the first dose                              | 3  | 0.731689735 | 0.243896578 | 1.223522584 | 0.026857046    | 0.062   |
| No. of AE after the second dose                             | 3  | 0.564293266 | 0.188097755 | 0.937683781 | 0.020712673    | 0.667   |
| Age                                                         | 1  | 0.238760764 | 0.238760764 | 1.191375055 | 0.008684038    | 0.177   |
| BMI                                                         | 1  | 0.280693939 | 0.280693939 | 1.400894948 | 0.010270423    | 0.044   |
| Bacterial motility                                          | 1  | 0.810878559 | 0.810878559 | 4.132897679 | 0.029492701    | 0.001   |
| Baseline observed species                                   | 1  | 0.838276756 | 0.838276756 | 4.276932721 | 0.030489209    | 0.001   |
| Baseline Simpson diversity                                  | 1  | 1.067447021 | 1.067447021 | 5.493400295 | 0.038824428    | 0.001   |
| Baseline Shannon diversity                                  | 1  | 0.935264127 | 0.935264127 | 4.789192895 | 0.034016765    | 0.001   |

AE, adverse effect(s). *P* values were given by PERMANOVA. sVNT-10: sVNT of 10-fold diluted plasma; sVNT-200: sVNT of 200-fold diluted plasma.

**Supplementary Table 6. Difference of dietary habits at baseline and one-month after second dose of vaccination (n=72)**

| <b>Dietary intake (consumed in the past week)</b> | <b>Baseline</b> | <b>One-month after 2<sup>nd</sup> dose of vaccination</b> | <b>p value</b> |
|---------------------------------------------------|-----------------|-----------------------------------------------------------|----------------|
| <b>1</b> Pasta, pasta salad, or noodles           | 70              | 70                                                        | 1.00           |
| <b>2</b> Bread                                    | 69              | 69                                                        | 1.00           |
| <b>3</b> Sweet baked foods                        | 66              | 66                                                        | 1.00           |
| <b>4</b> Meats                                    | 71              | 71                                                        | 1.00           |
| <b>5</b> Seafood                                  | 66              | 66                                                        | 1.00           |
| <b>6</b> Vegetables                               | 72              | 72                                                        | N/A            |
| <b>7</b> Fruits and products                      | 72              | 72                                                        | N/A            |
| <b>8</b> Milk and dairy products                  | 58              | 61                                                        | 0.25           |
| <b>9</b> Soup                                     | 70              | 70                                                        | 1.00           |
| <b>10</b> Tea and coffee                          | 63              | 62                                                        | 1.00           |
| <b>11</b> Sugars and syrups                       | 56              | 56                                                        | 1.00           |
| <b>12</b> Alcoholic drinks                        | 15              | 18                                                        | 0.25           |
| <b>13</b> Vitamin pills                           | 22              | 21                                                        | 1.00           |

Supplementary Table 7. Mixed effect models for persistently differentially abundant species between low responders and responders

| Biomarker                           | Baseline abundance            |                               | One-month abundance           |                               | Model 1                |         | Model 2                 |         |
|-------------------------------------|-------------------------------|-------------------------------|-------------------------------|-------------------------------|------------------------|---------|-------------------------|---------|
|                                     | Low-responders                | High-responders               | Low-responders                | High-responders               | Effect size            | P value | Effect size             | P value |
| <b>CoronaVac</b>                    |                               |                               |                               |                               |                        |         |                         |         |
| <i>Bifidobacterium adolescentis</i> | 0e+00 (0e+00, 7.03e-03)       | 9.65e-03 (4.03e-02, 8.46e-02) | 0e+00 (0e+00, 1.96e-03)       | 2.43e-03 (8.06e-03, 3.7e-02)  | 0.109 (0.027, 0.192)   | 0.011   | 0.109 (0.016, 0.203)    | 0.023   |
| <i>Adlercreutzia equolifaciens</i>  | 6.29e-05 (5.7e-04, 3.15e-03)  | 3.17e-03 (3.64e-03, 6.21e-03) | 0e+00 (8.52e-05, 7.12e-04)    | 4.17e-04 (6.08e-04, 2.18e-03) | 0.02 (-0.004, 0.044)   | 0.096   | 0.019 (-0.007, 0.046)   | 0.148   |
| <i>Asaccharobacter celatus</i>      | 0e+00 (1.27e-04, 8.02e-04)    | 8.7e-04 (1.25e-03, 2.29e-03)  | 0e+00 (0e+00, 2.59e-04)       | 7.01e-05 (2.57e-04, 5.72e-04) | 0.011 (-0.002, 0.024)  | 0.083   | 0.011 (-0.003, 0.025)   | 0.127   |
| <i>Ruminococcus</i> sp CAG 330      | 0e+00 (0e+00, 0e+00)          | 0e+00 (0e+00, 0e+00)          | 0e+00 (0e+00, 0e+00)          | 0e+00 (0e+00, 0e+00)          | 0.011 (0, 0.022)       | 0.048   | 0.007 (-0.005, 0.019)   | 0.257   |
| <i>Mitsuokella multacida</i>        | 0e+00 (0e+00, 0e+00)          | 0e+00 (0e+00, 0e+00)          | 0e+00 (0e+00, 0e+00)          | 0e+00 (0e+00, 0e+00)          | 0.01 (0.001, 0.018)    | 0.025   | 0.004 (-0.005, 0.012)   | 0.384   |
| <i>Bacteroides vulgatus</i>         | 1.5e-02 (5.4e-02, 7.37e-02)   | 4.31e-03 (9.7e-03, 4.11e-02)  | 3.81e-02 (6.23e-02, 1.59e-01) | 5.97e-03 (2.82e-02, 4.05e-02) | -0.089 (-0.17, -0.007) | 0.034   | -0.104 (-0.196, -0.012) | 0.027   |
| <b>BNT162b2</b>                     |                               |                               |                               |                               |                        |         |                         |         |
| <i>Bacteroides</i> sp OM05 12       | 0e+00 (0e+00, 0e+00)          | 0e+00 (0e+00, 1.06e-04)       | 0e+00 (0e+00, 0e+00)          | 0e+00 (0e+00, 2.38e-04)       | 0.016 (0.006, 0.026)   | 0.002   | 0.015 (0.005, 0.025)    | 0.003   |
| <i>Bacteroides thetaiotaomicron</i> | 6.15e-04 (2.11e-03, 6.63e-03) | 1.96e-03 (6.55e-03, 1.5e-02)  | 1.18e-03 (4.17e-03, 7.59e-03) | 3.6e-03 (6.2e-03, 1.91e-02)   | 0.044 (0.018, 0.07)    | 0.001   | 0.045 (0.02, 0.071)     | 0.001   |
| <i>Fusobacterium mortiferum</i>     | 0e+00 (0e+00, 0e+00)          | 0e+00 (0e+00, 0e+00)          | 0e+00 (0e+00, 0e+00)          | 0e+00 (0e+00, 0e+00)          | -0.011 (-0.022, 0.001) | 0.061   | -0.011 (-0.022, 0)      | 0.061   |

Model 1 is a crude model; Model 2 adjusted for age and time difference between sample collections.



**Supplementary Table 8. Full names of differentially abundant pathways between high/low responders**

| <b>Abbreviation</b>     | <b>Full name</b>                                                      |
|-------------------------|-----------------------------------------------------------------------|
| ARGININE-SYN4-PWY       | L-ornithine biosynthesis II                                           |
| BIOTIN-BIOSYNTHESIS-PWY | biotin biosynthesis I                                                 |
| COA-PWY-1               | superpathway of coenzyme A biosynthesis III (mammals)                 |
| COA-PWY                 | coenzyme A biosynthesis I (prokaryotic)                               |
| DAPLYSINESYN-PWY        | L-lysine biosynthesis I                                               |
| FASYN-ELONG-PWY         | fatty acid elongation -- saturated                                    |
| FASYN-INITIAL-PWY       | superpathway of fatty acid biosynthesis initiation (E. coli)          |
| FERMENTATION-PWY        | mixed acid fermentation                                               |
| FUC-RHAMCAT-PWY         | superpathway of fucose and rhamnose degradation                       |
| FUCCAT-PWY              | fucose degradation                                                    |
| GALACTARDEG-PWY         | D-galactarate degradation I                                           |
| GLUCARGALACTSUPER-PWY   | superpathway of D-glucarate and D-galactarate degradation             |
| GLUCONEO-PWY            | gluconeogenesis I                                                     |
| GLUCOSE1PMETAB-PWY      | glucose and glucose-1-phosphate degradation                           |
| GLUCUROCAT-PWY          | superpathway of $\beta$ -D-glucuronosides degradation                 |
| HISTSYN-PWY             | L-histidine biosynthesis                                              |
| NAD-BIOSYNTHESIS-II     | NAD salvage pathway III (to nicotinamide riboside)                    |
| NONMEVIPP-PWY           | methylerythritol phosphate pathway I                                  |
| NONOXIPENT-PWY          | pentose phosphate pathway (non-oxidative branch) I                    |
| P105-PWY                | TCA cycle IV (2-oxoglutarate decarboxylase)                           |
| P4-PWY                  | superpathway of L-lysine, L-threonine and L-methionine biosynthesis I |
| P441-PWY                | superpathway of N-acetylneuraminat degradation                        |
| PEPTIDOGLYCANSYN-PWY    | peptidoglycan biosynthesis I (meso-diaminopimelate containing)        |
| POLYISOPRENSYN-PWY      | polyisoprenoid biosynthesis (E. coli)                                 |
| POLYISOPRENSYN-PWY      | polyisoprenoid biosynthesis (E. coli)                                 |
| PWY-241                 | C4 photosynthetic carbon assimilation cycle, NADP-ME type             |

|          |                                                                                     |
|----------|-------------------------------------------------------------------------------------|
| PWY-2942 | L-lysine biosynthesis III                                                           |
| PWY-4242 |                                                                                     |
| PWY-5097 | L-lysine biosynthesis VI                                                            |
| PWY-5104 | L-isoleucine biosynthesis IV                                                        |
| PWY-5304 | superpathway of sulfur oxidation ( <i>Acidianus ambivalens</i> )                    |
| PWY-5345 | superpathway of L-methionine biosynthesis (by sulfhydrylation)                      |
| PWY-5367 | petroselinate biosynthesis                                                          |
| PWY-5384 | sucrose degradation IV (sucrose phosphorylase)                                      |
| PWY-5464 | superpathway of cytosolic glycolysis (plants), pyruvate dehydrogenase and TCA cycle |
| PWY-5675 | nitrate reduction V (assimilatory)                                                  |
| PWY-5686 | UMP biosynthesis I                                                                  |
| PWY-5690 | TCA cycle II (plants and fungi)                                                     |
| PWY-5723 | Rubisco shunt                                                                       |
| PWY-5837 | 2-carboxy-1,4-naphthoquinol biosynthesis                                            |
| PWY-5838 | superpathway of menaquinol-8 biosynthesis I                                         |
| PWY-5840 | superpathway of menaquinol-7 biosynthesis                                           |
| PWY-5845 | superpathway of menaquinol-9 biosynthesis                                           |
| PWY-5850 | superpathway of menaquinol-6 biosynthesis                                           |
| PWY-5860 | superpathway of demethylmenaquinol-6 biosynthesis I                                 |
| PWY-5861 | superpathway of demethylmenaquinol-8 biosynthesis I                                 |
| PWY-5862 | superpathway of demethylmenaquinol-9 biosynthesis                                   |
| PWY-5896 | superpathway of menaquinol-10 biosynthesis                                          |
| PWY-5897 | superpathway of menaquinol-11 biosynthesis                                          |
| PWY-5898 | superpathway of menaquinol-12 biosynthesis                                          |
| PWY-5899 | superpathway of menaquinol-13 biosynthesis                                          |
| PWY-5913 | partial TCA cycle (obligate autotrophs)                                             |
| PWY-5971 | palmitate biosynthesis (type II fatty acid synthase)                                |
| PWY-5989 | stearate biosynthesis II (bacteria and plants)                                      |
| PWY-6168 | flavin biosynthesis III (fungi)                                                     |

|          |                                                                                    |
|----------|------------------------------------------------------------------------------------|
| PWY-622  | starch biosynthesis                                                                |
| PWY-6282 | palmitoleate biosynthesis I (from (5Z)-dodec-5-enoate)                             |
| PWY-6284 | superpathway of unsaturated fatty acids biosynthesis (E. coli)                     |
| PWY-6285 | superpathway of fatty acids biosynthesis (E. coli)                                 |
| PWY-6385 | peptidoglycan biosynthesis III (mycobacteria)                                      |
| PWY-6386 | UDP-N-acetylmuramoyl-pentapeptide biosynthesis II (lysine-containing)              |
| PWY-6387 | UDP-N-acetylmuramoyl-pentapeptide biosynthesis I (meso-diaminopimelate containing) |
| PWY-6519 | 8-amino-7-oxononanoate biosynthesis I                                              |
| PWY-6545 | pyrimidine deoxyribonucleotides de novo biosynthesis III                           |
| PWY-6608 | guanosine nucleotides degradation III                                              |
| PWY-6700 | queuosine biosynthesis I (de novo)                                                 |
| PWY-6737 | starch degradation V                                                               |
| PWY-6749 | CMP-legionamate biosynthesis I                                                     |
| PWY-6969 | TCA cycle V (2-oxoglutarate synthase)                                              |
| PWY-7003 | glycerol degradation to butanol                                                    |
| PWY-7115 | C4 photosynthetic carbon assimilation cycle, NAD-ME type                           |
| PWY-7117 | C4 photosynthetic carbon assimilation cycle, PEPCK type                            |
| PWY-7184 | pyrimidine deoxyribonucleotides de novo biosynthesis I                             |
| PWY-7198 | pyrimidine deoxyribonucleotides de novo biosynthesis IV                            |
| PWY-7200 | superpathway of pyrimidine deoxyribonucleoside salvage                             |
| PWY-7209 | superpathway of pyrimidine ribonucleosides degradation                             |
| PWY-7210 | pyrimidine deoxyribonucleotides biosynthesis from CTP                              |
| PWY-7211 | superpathway of pyrimidine deoxyribonucleotides de novo biosynthesis               |
| PWY-7219 | adenosine ribonucleotides de novo biosynthesis                                     |
| PWY-7221 | guanosine ribonucleotides de novo biosynthesis                                     |
| PWY-7234 | inosine-5 p-phosphate biosynthesis III                                             |
| PWY-724  | superpathway of L-lysine, L-threonine and L-methionine biosynthesis II             |
| PWY-7242 | D-fructuronate degradation                                                         |
| PWY-7315 | dTDP-N-acetylthomosamine biosynthesis                                              |

---

|                 |                                                                                |
|-----------------|--------------------------------------------------------------------------------|
| PWY-7388        | octanoyl-[acyl-carrier protein] biosynthesis (mitochondria, yeast)             |
| PWY-7664        | oleate biosynthesis IV (anaerobic)                                             |
| PWY0-166        | superpathway of pyrimidine deoxyribonucleotides de novo biosynthesis (E. coli) |
| PWY0-781        | aspartate superpathway                                                         |
| PWY0-862        | (5Z)-dodecenoate biosynthesis I                                                |
| PWY4LZ-257      | superpathway of fermentation (Chlamydomonas reinhardtii)                       |
| PWY4LZ-257      | superpathway of fermentation (Chlamydomonas reinhardtii)                       |
| PWY66-399       | gluconeogenesis III                                                            |
| RIBOSYN2-PWY    | flavin biosynthesis I (bacteria and plants)                                    |
| SO4ASSIM-PWY    | assimilatory sulfate reduction I                                               |
| SULFATE-CYS-PWY | superpathway of sulfate assimilation and cysteine biosynthesis                 |
| THISYNARA-PWY   | superpathway of thiamine diphosphate biosynthesis III (eukaryotes)             |
| TRPSYN-PWY      | L-tryptophan biosynthesis                                                      |
| UDPNAGSYN-PWY   | UDP-N-acetyl-D-glucosamine biosynthesis I                                      |

---

Supplementary Table 9. Logistic regression models for having adverse effect after first dose of vaccination based on baseline gut microbiota clusters

| Vaccine group                              | Dose | Model 1 |       |        |              | Model 2 |       |        |              |
|--------------------------------------------|------|---------|-------|--------|--------------|---------|-------|--------|--------------|
|                                            |      | OR      | 2.50% | 97.50% | p            | OR      | 2.50% | 97.50% | p            |
| <b>BNT162b2</b> (Cluster 2 vs. Cluster 1)  | 1    | 6.93    | 1.41  | 34.19  | <b>0.017</b> | 13.78   | 2.48  | 76.6   | <b>0.003</b> |
|                                            | 2    | 7.41    | 1.14  | 47.96  | <b>0.036</b> | 9.55    | 1.35  | 67.43  | <b>0.024</b> |
| <b>CoronaVac</b> (Cluster 2 vs. Cluster 1) | 1    | 6.67    | 1.34  | 33.12  | <b>0.02</b>  |         |       |        |              |
|                                            | 2    | 1.58    | 0.35  | 7.17   | 0.551        |         |       |        |              |

Model 1 is a crude model; Model 2 adjusted for alcohol drinking within 2 weeks prior to the 1st dose of vaccination, which was significantly associated with cluster membership in BNT162b2 vaccinees.

**Supplementary Table 10. The association between immunity response and adverse events after first dose of vaccination (Overall)**

| Adverse events                                          | BNT162b2 (N=101)          |         |                   |              | CoronaVac (N=37)        |              |                   |              |
|---------------------------------------------------------|---------------------------|---------|-------------------|--------------|-------------------------|--------------|-------------------|--------------|
|                                                         | AUC of spikeRBD IgG       | P value | sVNT-200          | P value      | AUC of spikeRBD IgG     | P value      | sVNT-10           | P value      |
| Any adverse events after first dose                     |                           | 0.995   |                   | 0.112        |                         | 0.244        |                   | 0.298        |
| No                                                      | 9062.0 (7810.5, 10699.5)  |         | 39.0 (24.1, 41.7) |              | 1895.5 (1541.0, 2587.0) |              | 65.3 (50.6, 67.7) |              |
| Yes                                                     | 8659.0 (7405.0, 11048.0)  |         | 43.1 (33.3, 54.5) |              | 1604.0 (1150.0, 2175.0) |              | 51.8 (36.9, 69.5) |              |
| Injection site pain/burn                                |                           | 0.898   |                   | 0.206        |                         | 0.424        |                   | 0.478        |
| No                                                      | 8497.5 (7459.0, 11880.0)  |         | 39.2 (34.5, 45.3) |              | 1726.0 (1542.5, 2523.0) |              | 62.2 (46.6, 67.1) |              |
| Yes                                                     | 8677.5 (7516.5, 10679.0)  |         | 43.2 (32.2, 55.4) |              | 1604.0 (1046.0, 2373.0) |              | 51.8 (24.9, 69.6) |              |
| Fatigue                                                 |                           | 0.593   |                   | <b>0.032</b> |                         | 0.244        |                   | <b>0.052</b> |
| No                                                      | 8656.0 (7398.0, 10869.5)  |         | 39.4 (29.9, 52.6) |              | 1740.0 (1418.0, 2587.0) |              | 59.0 (44.3, 69.6) |              |
| Yes                                                     | 8723.0 (7732.0, 11058.0)  |         | 44.9 (40.1, 56.5) |              | 1544.0 (1295.0, 1551.0) |              | 35.2 (26.5, 40.4) |              |
| Fever                                                   |                           | 0.499   |                   | <b>0.046</b> |                         | -            |                   | -            |
| No                                                      | 8657.5 (7405.0, 11058.0)  |         | 41.2 (33.1, 52.6) |              | 1726.0 (1450.5, 2523.0) |              | 57.9 (43.2, 69.5) |              |
| Yes                                                     | 10408.5 (8347.0, 10667.0) |         | 58.1 (51.4, 60.9) |              | NA                      |              | NA                |              |
| Injection site swelling, pruritus, erythema, induration |                           | 0.398   |                   | 0.162        |                         | 0.758        |                   | 0.486        |
| No                                                      | 9065.5 (7628.0, 11627.0)  |         | 40.9 (31.1, 52.6) |              | 1687.5 (1385.5, 2523.0) |              | 55.7 (40.4, 68.5) |              |
| Yes                                                     | 8301.5 (7229.0, 10287.0)  |         | 48.4 (36.1, 56.5) |              |                         |              |                   |              |
| Myalgia                                                 |                           | 0.163   |                   | 0.825        |                         | <b>0.036</b> |                   | 0.090        |
| No                                                      | 9065.5 (7732.0, 11627.0)  |         | 42.0 (33.3, 54.4) |              | 1727.0 (1484.5, 2523)   |              | 58.3 (45, 69.5)   |              |
| Yes                                                     | 8384.5 (7229.0, 9266.0)   |         | 47.4 (28.7, 54.5) |              | 1036.9 (819.7, 1254)    |              | 29.6 (17.1, 42.1) |              |
| Drowsiness                                              |                           | 0.233   |                   | 0.121        |                         | 0.292        |                   | 0.267        |
| No                                                      | 8538.0 (7398.0, 10869.5)  |         | 41.2 (32.1, 52.6) |              | 1627.0 (1353, 2459)     |              | 52.8 (38.6, 69.3) |              |
| Yes                                                     | 9402.0 (8347.0, 12084)    |         | 52.0 (40.8, 55.5) |              | 1753.0 (1739, 3614.5)   |              | 64.7 (62.2, 74.6) |              |
| Headache                                                |                           | 0.092   |                   | 0.783        |                         | -            |                   | -            |
| No                                                      | 8847.0 (7732.0, 11058.0)  |         | 42.9 (33.1, 54.4) |              | 1726.0 (1385.5, 2523.0) |              | 57.9 (40.4, 69.5) |              |
| Yes                                                     | 7675.0 (6676.0, 8535.0)   |         | 41.3 (38.3, 50.2) |              | NA                      |              | NA                |              |
| Chills                                                  |                           | 0.793   |                   | 0.163        |                         | -            |                   | -            |
| No                                                      | 8696.0 (7628.0, 11048.0)  |         | 42.6 (33.1, 53.9) |              | 1725.0 (1418.0, 2459.0) |              | 57.6 (42.1, 69.3) |              |
| Yes                                                     | 8347.0 (7620.5, 9702.5)   |         | 57.8 (48.9, 61.5) |              | NA                      |              | NA                |              |

**Supplementary Table 10. The association between immunity response and adverse events after first dose of vaccination (Overall)**

| Adverse events   | BNT162b2 (N=101)         |         |                   |         | CoronaVac (N=37)        |         |                   |         |
|------------------|--------------------------|---------|-------------------|---------|-------------------------|---------|-------------------|---------|
|                  | AUC of spikeRBD IgG      | P value | sVNT-200          | P value | AUC of spikeRBD IgG     | P value | sVNT-10           | P value |
| Dizziness        |                          | 0.429   |                   | 0.372   |                         | -       |                   | -       |
| No               | 8701.5 (7628.0, 11445.0) |         | 42.0 (33.3, 52.6) |         | 1687.5 (1385.5, 2416.0) |         | 55.7 (40.4, 68.5) |         |
| Yes              | 8301.5 (7229.0, 9476.0)  |         | 56.5 (28.4, 57.8) |         | NA                      |         | NA                |         |
| Arthralgia       |                          | 0.100   |                   | 0.937   |                         | -       |                   | -       |
| No               | 8709.5 (7658.0, 11251.5) |         | 42.7 (33.2, 54.4) |         | 1725.0 (1418.0, 2459.0) |         | 57.6 (42.1, 69.3) |         |
| Yes              | 7452.0 (6379.5, 8191.0)  |         | 41.6 (33.9, 50.2) |         | NA                      |         | NA                |         |
| Loss of appetite |                          | 0.951   |                   | 0.284   |                         | -       |                   | -       |
| No               | 8677.5 (7405.0, 11058.0) |         | 42.0 (33.1, 54.4) |         | 1726.0 (1450.5, 2523.0) |         | 57.9 (43.2, 69.5) |         |
| Yes              | 8597.0 (8347.0, 8847.0)  |         | 51.3 (44.9, 57.8) |         | NA                      |         | NA                |         |
| Abdominal pain   |                          | 0.253   |                   | 0.556   |                         | -       |                   | -       |
| No               | 8659.0 (7516.5, 10869.5) |         | 42.6 (33.2, 54.4) |         | 1725.0 (1418.0, 2459.0) |         | 57.6 (42.1, 69.3) |         |
| Yes              |                          |         |                   |         | NA                      |         | NA                |         |
| Rhinorrhea       |                          | 0.146   |                   | 0.268   |                         | -       |                   | -       |
| No               | 8696.0 (7651.5, 11053.0) |         | 42.9 (33.3, 54.4) |         | 1726.0 (1450.5, 2523.0) |         | 57.9 (43.2, 69.5) |         |
| Yes              |                          |         |                   |         | NA                      |         | NA                |         |
| Sore throat      |                          | 0.234   |                   | 0.917   |                         | -       |                   | -       |
| No               | 8659.0 (7516.5, 10869.5) |         | 42.9 (33.2, 54.4) |         | 1725.0 (1418.0, 2459.0) |         | 57.6 (42.1, 69.3) |         |
| Yes              |                          |         |                   |         | NA                      |         | NA                |         |
| Diarrhea         |                          | 0.530   |                   | 0.331   |                         | -       |                   | -       |
| No               | 8677.5 (7628.0, 11058.0) |         | 42.0 (33.1, 54.4) |         | 1726.0 (1450.5, 2523.0) |         | 57.9 (43.2, 69.5) |         |
| Yes              | 8038.0 (7229.0, 8847.0)  |         | 50.7 (44.9, 56.5) |         | NA                      |         | NA                |         |
| Pruritus         |                          | 0.856   |                   | 0.746   |                         | 0.330   |                   | 0.126   |
| No               | 8659.0 (7628.0, 11048.0) |         | 42.6 (33.1, 54.4) |         | 1650.0 (1385.5, 2416.0) |         | 53.8 (40.4, 67.1) |         |
| Yes              | 8723.0 (7504.0, 10175.0) |         | 43.2 (39.6, 50.0) |         | 2294.0 (1977.0, 2611.0) |         | 75.3 (69.6, 81.0) |         |
| Coughing         |                          | -       |                   | -       |                         | -       |                   | -       |
| No               | 8696.0 (7651.5, 11053.0) |         | 42.6 (33.2, 54.4) |         | 1725.0 (1418.0, 2459.0) |         | 57.6 (42.1, 69.3) |         |
| Yes              | NA                       |         | NA                |         | NA                      |         | NA                |         |
| Constipation     |                          | -       |                   | -       |                         | -       |                   | -       |
| No               | 8677.5 (7516.5, 11053.0) |         | 42.7 (33.2, 54.4) |         | 1725.0 (1418.0, 2459.0) |         | 57.6 (42.1, 69.3) |         |
| Yes              | NA                       |         | NA                |         | NA                      |         | NA                |         |



**Supplementary Table 10. The association between immunity response and adverse events after first dose of vaccination (Overall)**

| Adverse events       | BNT162b2 (N=101)         |         |                   |         | CoronaVac (N=37)        |         |                   |         |
|----------------------|--------------------------|---------|-------------------|---------|-------------------------|---------|-------------------|---------|
|                      | AUC of spikeRBD IgG      | P value | sVNT-200          | P value | AUC of spikeRBD IgG     | P value | sVNT-10           | P value |
| Abdominal distension |                          | -       |                   | -       |                         | -       |                   | -       |
| No                   | 8677.5 (7516.5, 11053.0) |         | 42.7 (33.2, 54.4) |         | 1725.0 (1418.0, 2459.0) |         | 57.6 (42.1, 69.3) |         |
| Yes                  | NA                       |         | NA                |         | NA                      |         | NA                |         |
| Nausea               |                          | -       |                   | -       |                         | -       |                   | -       |
| No                   | 8696.0 (7651.5, 11053.0) |         | 42.6 (33.2, 54.1) |         | 1725.0 (1418.0, 2459.0) |         | 57.6 (42.1, 69.3) |         |
| Yes                  | NA                       |         | NA                |         | NA                      |         | NA                |         |
| Flushing             |                          | -       |                   | -       |                         | -       |                   | -       |
| No                   | 8696.0 (7516.5, 11053.0) |         | 42.6 (33.2, 54.4) |         | 1725.0 (1418.0, 2459.0) |         | 57.6 (42.1, 69.3) |         |
| Yes                  | NA                       |         | NA                |         | NA                      |         | NA                |         |
| Hypersensitivity     |                          | -       |                   | -       |                         | -       |                   | -       |
| No                   | 8696.0 (7516.5, 11053.0) |         | 42.9 (33.3, 54.4) |         | 1725.0 (1418.0, 2459.0) |         | 57.6 (42.1, 69.3) |         |
| Yes                  | NA                       |         | NA                |         | NA                      |         | NA                |         |
| Muscle spasms        |                          | -       |                   | -       |                         | -       |                   | -       |
| No                   | 8696.0 (7516.5, 11053.0) |         | 42.9 (33.2, 54.4) |         | 1725.0 (1418.0, 2459.0) |         | 57.6 (42.1, 69.3) |         |
| Yes                  | NA                       |         | NA                |         | NA                      |         | NA                |         |
| Nasal Congestion     |                          | -       |                   | -       |                         | -       |                   | --      |
| No                   | 8696.0 (7516.5, 11053.0) |         | 42.9 (33.3, 54.4) |         | 1725.0 (1418.0, 2459.0) |         | 57.6 (42.1, 69.3) |         |
| Yes                  | NA                       |         | NA                |         | NA                      |         | NA                |         |
| Edema                |                          | -       |                   | -       |                         | -       |                   | -       |
| No                   | 8696.0 (7516.5, 11053.0) |         | 42.9 (33.3, 54.4) |         | 1725.0 (1418.0, 2459.0) |         | 57.6 (42.1, 69.3) |         |
| Yes                  | NA                       |         | NA                |         | NA                      |         | NA                |         |
| Vomiting             |                          | -       |                   | -       |                         | -       |                   | -       |
| No                   | 8696.0 (7516.5, 11053.0) |         | 42.9 (33.3, 54.4) |         | 1725.0 (1418.0, 2459.0) |         | 57.6 (42.1, 69.3) |         |
| Yes                  | NA                       |         | NA                |         | NA                      |         | NA                |         |
| Tremor               |                          | -       |                   | -       |                         | -       |                   | -       |
| No                   | 8696.0 (7516.5, 11053.0) |         | 42.9 (33.3, 54.4) |         | 1725.0 (1418.0, 2459.0) |         | 57.6 (42.1, 69.3) |         |
| Yes                  | NA                       |         | NA                |         | NA                      |         | NA                |         |
| Eyelid edema         |                          | -       |                   | -       |                         | -       |                   | -       |
| No                   | 8696.0 (7516.5, 11053.0) |         | 42.9 (33.3, 54.4) |         | 1725.0 (1418.0, 2459.0) |         | 57.6 (42.1, 69.3) |         |
| Yes                  | NA                       |         | NA                |         | NA                      |         | NA                |         |

**Supplementary Table 10. The association between immunity response and adverse events after first dose of vaccination (Overall)**

| Adverse events                    | BNT162b2 (N=101)         |         |                   |         | CoronaVac (N=37)        |         |                   |         |
|-----------------------------------|--------------------------|---------|-------------------|---------|-------------------------|---------|-------------------|---------|
|                                   | AUC of spikeRBD IgG      | P value | sVNT-200          | P value | AUC of spikeRBD IgG     | P value | sVNT-10           | P value |
| Nosebleeds                        |                          | -       |                   | -       |                         | -       |                   | -       |
| No                                | 8696.0 (7516.5, 11053.0) |         | 42.9 (33.3, 54.4) |         | 1725.0 (1418.0, 2459.0) |         | 57.6 (42.1, 69.3) |         |
| Yes                               | NA                       |         | NA                |         | NA                      |         | NA                |         |
| Hyposmia                          |                          | -       |                   | -       |                         | -       |                   | -       |
| No                                | 8696.0 (7516.5, 11053.0) |         | 42.9 (33.3, 54.4) |         | 1725.0 (1418.0, 2459.0) |         | 57.6 (42.1, 69.3) |         |
| Yes                               | NA                       |         | NA                |         | NA                      |         | NA                |         |
| Ocular congestion                 |                          | -       |                   | -       |                         | -       |                   | -       |
| No                                | 8696.0 (7516.5, 11053.0) |         | 42.9 (33.3, 54.4) |         | 1725.0 (1418.0, 2459.0) |         | 57.6 (42.1, 69.3) |         |
| Yes                               | NA                       |         | NA                |         | NA                      |         | NA                |         |
| Number of adverse events (listed) |                          | 0.933   |                   | 0.018   |                         | 0.139   |                   | 0.204   |
| 0                                 | 9062.0 (7810.5, 10699.5) |         | 39.0 (24.1, 41.7) |         | 1895.5 (1541.0, 2587.0) |         | 65.3 (50.6, 67.7) |         |
| 1                                 | 8659.0 (7398.0, 11356.0) |         | 39.4 (30.5, 53.5) |         | 1739.0 (1399.5, 2492.0) |         | 57.9 (39.7, 73.8) |         |
| 2                                 | 8238.0 (7298.0, 9476.0)  |         | 43.1 (29.9, 50.0) |         | 1150.0 (1012.8, 1406.0) |         | 40.4 (28.2, 43.9) |         |
| ≥3                                | 8707.0 (7994.0, 11058.0) |         | 51.0 (40.1, 56.5) |         | 1977.0 (1398.4, 3726.5) |         | 69.6 (43.4, 77.1) |         |
| Others <sup>1</sup>               |                          | 0.429   |                   | 0.337   |                         | -       |                   | -       |
| No                                | 8715.0 (7651.5, 11251.5) |         | 42.0 (32.1, 54.1) |         | 1687.5 (1385.5, 2523.0) |         | 57.9 (40.4, 69.5) |         |
| Yes                               | 8301.5 (6861.0, 9497.5)  |         | 47.4 (37.8, 57.1) |         | NA                      |         | NA                |         |

sVNT-10: sVNT of 10-fold diluted plasma; sVNT-200: sVNT of 200-fold diluted plasma. Data are median (IQR). NA, Not applicable. There is one missing data in BNT162b2 group. 1.

Others include low back pain, increase of appetite, muscle pain, rib pain, eyes pain, palpitations.

**Supplementary Table 11. The association between immunity response and adverse events after second dose of vaccination (Overall)**

| Adverse events                                          | BNT162b2 (N=101)         |         |                   |         | CoronaVac (N=37)        |         |                   |              |
|---------------------------------------------------------|--------------------------|---------|-------------------|---------|-------------------------|---------|-------------------|--------------|
|                                                         | AUC of spikeRBD IgG      | p-value | sVNT-200          | p-value | AUC of spikeRBD IgG     | p-value | sVNT-10           | p-value      |
| Any adverse events after second dose                    |                          | 0.121   |                   | 0.887   |                         | 0.737   |                   | 0.835        |
| No                                                      | 9701.0 (9062.0, 12659.0) |         | 44.1 (39.3, 46.4) |         | 1634.0 (1385.5, 2325.5) |         | 52.2 (48.7, 72.7) |              |
| Yes                                                     | 8656.0 (7398.0, 10869.5) |         | 42.6 (33.2, 54.4) |         | 1725.0 (1486.0, 2459.0) |         | 58.3 (38.6, 69.3) |              |
| Injection site pain/burn                                |                          | 0.986   |                   | 0.213   |                         | 0.867   |                   | 0.797        |
| No                                                      | 8576.0 (7732.0, 11664.0) |         | 37.0 (33.1, 51.4) |         | 1725.0 (1483.0, 2181.0) |         | 53.8 (45.7, 66.5) |              |
| Yes                                                     | 8696.0 (7516.5, 10679.0) |         | 43.2 (33.3, 55.4) |         | 1776.0 (1150.0, 2857.0) |         | 57.9 (31.3, 69.5) |              |
| Fatigue                                                 |                          | 0.352   |                   | 0.098   |                         | 0.363   |                   | 0.533        |
| No                                                      | 8659.0 (7398.0, 9973.0)  |         | 40.1 (29.9, 52.6) |         | 1753.0 (1385.5, 2599.0) |         | 58.3 (43.2, 69.5) |              |
| Yes                                                     | 8707.0 (7732.0, 11698.0) |         | 43.9 (37, 55.5)   |         | 1551.0 (1486.0, 1650.0) |         | 51.6 (35.2, 66.1) |              |
| Fever                                                   |                          | 0.347   |                   | 0.119   |                         | -       |                   | -            |
| No                                                      | 8538.0 (7391.0, 10691.0) |         | 41.2 (29.9, 52.6) |         | 1725.0 (1418.0, 2459.0) |         | 57.6 (42.1, 69.3) |              |
| Yes                                                     | 9402.0 (7998.0, 11251.5) |         | 48.3 (36.1, 56.7) |         | NA                      |         | NA                |              |
| Injection site swelling, pruritus, erythema, induration |                          | 0.844   |                   | 0.078   |                         | 0.342   |                   | 0.857        |
| No                                                      | 8715.0 (7516.5, 10869.5) |         | 41.1 (30.5, 52.4) |         | 1604.0 (1385.5, 2416.0) |         | 53.8 (40.4, 73.8) |              |
| Yes                                                     | 8479.5 (7284.5, 11251.5) |         | 48.4 (36.2, 57.4) |         | 1927.5 (1650.0, 2835.0) |         | 66.0 (44.3, 67.7) |              |
| Myalgia                                                 |                          | 0.623   |                   | 0.517   |                         | 0.817   |                   | 0.769        |
| No                                                      | 8785.0 (7628.0, 11627.0) |         | 43.1 (33.3, 55.2) |         | 1727.0 (1385.5, 2523.0) |         | 57.6 (40.4, 69.5) |              |
| Yes                                                     | 8556.5 (7405.0, 9904.0)  |         | 40.3 (28.7, 52.5) |         | 1641.5 (1558.0, 1725.0) |         | 52.7 (45.7, 59.7) |              |
| Drowsiness                                              |                          | 0.676   |                   | 0.250   |                         | 0.108   |                   | <b>0.048</b> |
| No                                                      | 8616.0 (7540.0, 10869.5) |         | 41.2 (30.5, 53.5) |         | 1650.0 (1385.5, 2416.0) |         | 53.8 (40.4, 67.1) |              |
| Yes                                                     | 8777.0 (7261.0, 11764.5) |         | 46.6 (40.0, 55.4) |         | 3828.5 (2181.0, 5476.0) |         | 81.9 (79.3, 84.6) |              |
| Headache                                                |                          | 0.702   |                   | 0.937   |                         | -       |                   | -            |
| No                                                      | 8707.0 (7710.0, 11159.0) |         | 43.1 (33.2, 53.5) |         | 1725.0 (1418.0, 2459.0) |         | 57.6 (42.1, 69.3) |              |
| Yes                                                     | 8422.0 (7298.0, 11048.0) |         | 41.3 (36.3, 54.4) |         | NA                      |         | NA                |              |
| Chills                                                  |                          | 0.025   |                   | 0.311   |                         | -       |                   | -            |

**Supplementary Table 11. The association between immunity response and adverse events after second dose of vaccination (Overall)**

| Adverse events   | BNT162b2 (N=101)           |         |                   |         | CoronaVac (N=37)        |         |                   |         |
|------------------|----------------------------|---------|-------------------|---------|-------------------------|---------|-------------------|---------|
|                  | AUC of spikeRBD IgG        | p-value | sVNT-200          | p-value | AUC of spikeRBD IgG     | p-value | sVNT-10           | p-value |
| No               | 8537.0 (7298.0, 10586.0)   |         | 41.3 (33.1, 52.6) |         | 1687.5 (1385.5, 2523.0) |         | 55.7 (40.4, 68.5) |         |
| Yes              | 10245.0 (8884.0, 11812.0)  |         | 50.0 (36.7, 56.2) |         | NA                      |         | NA                |         |
| Dizziness        |                            | 0.820   |                   | 0.311   |                         | -       |                   | -       |
| No               | 8657.5 (7540.0, 10874.5)   |         | 42.0 (32.1, 52.6) |         | 1687.5 (1385.5, 2416.0) |         | 55.7 (40.4, 68.5) |         |
| Yes              | 9091.5 (7428.5, 11337.5)   |         | 49.0 (36.3, 57.3) |         | NA                      |         | NA                |         |
| Arthralgia       |                            | 0.850   |                   | 0.690   |                         | -       |                   | -       |
| No               | 8677.5 (7628.0, 11058.0)   |         | 42.7 (33.3, 54.5) |         | 1725.0 (1418.0, 2459.0) |         | 57.6 (42.1, 69.3) |         |
| Yes              | 8681.5 (7405.0, 9904.0)    |         | 42.2 (28.4, 52.5) |         | NA                      |         | NA                |         |
| Loss of appetite |                            | 0.317   |                   | 0.317   |                         | -       |                   | -       |
| No               | 8659.0 (7391.0, 11048.0)   |         | 41.3 (33.1, 54.4) |         | 1725.0 (1418.0, 2459.0) |         | 57.6 (42.1, 69.3) |         |
| Yes              | 8847.0 (8501.5, 10674.5)   |         | 52.2 (42.7, 53.9) |         | NA                      |         | NA                |         |
| Abdominal pain   |                            | 0.744   |                   | 0.994   |                         | -       |                   | -       |
| No               | 8677.5 (7628.0, 11048.0)   |         | 42.7 (33.1, 54.5) |         | 1725.0 (1418.0, 2459.0) |         | 57.6 (42.1, 69.3) |         |
| Yes              | 8949.0 (6519.0, 11445.0)   |         | 44.5 (35.7, 52.2) |         | NA                      |         | NA                |         |
| Rhinorrhea       |                            | 0.601   |                   | 0.236   |                         | 0.243   |                   | 0.300   |
| No               | 8659.0 (7516.5, 11053.0)   |         | 41.3 (33.2, 53.5) |         | 1727.0 (1450.5, 2523.0) |         | 58.3 (43.2, 69.5) |         |
| Yes              | 8256.0 (6519.0, 10287.0)   |         | 53.9 (48.3, 56.5) |         | 1268.8 (979.5, 1558.0)  |         | 42.1 (38.6, 45.7) |         |
| Sore throat      |                            | 0.051   |                   | 0.856   |                         | -       |                   | -       |
| No               | 8616.0 (7405.0, 10586.0)   |         | 43.0 (33.1, 54.5) |         | 1725.0 (1418.0, 2459.0) |         | 57.6 (42.1, 69.3) |         |
| Yes              | 12040.5 (11445.0, 12087.0) |         | 40.8 (33.3, 53.9) |         | NA                      |         | NA                |         |
| Diarrhea         |                            | 0.507   |                   | 0.420   |                         | -       |                   | -       |
| No               | 8696.0 (7651.5, 10869.5)   |         | 43.1 (32.1, 54.5) |         | 1726.0 (1450.5, 2523.0) |         | 57.9 (43.2, 69.5) |         |
| Yes              | 7846.0 (6519.0, 11445.0)   |         | 39.4 (33.3, 40.6) |         | NA                      |         | NA                |         |
| Pruritus         |                            | 0.840   |                   | 0.718   |                         | 0.216   |                   | 0.270   |
| No               | 8657.5 (7516.5, 11053.0)   |         | 42.0 (33.2, 54.4) |         | 1650.0 (1385.5, 2277.0) |         | 53.8 (40.4, 68.5) |         |
| Yes              | 8709.5 (7113.0, 10175.0)   |         | 47.6 (35.8, 54.4) |         | 2535.0 (2459.0, 2611.0) |         | 72.9 (64.7, 81.0) |         |
| Coughing         |                            | 0.329   |                   | 0.196   |                         | -       |                   | -       |

**Supplementary Table 11. The association between immunity response and adverse events after second dose of vaccination (Overall)**

| Adverse events       | BNT162b2 (N=101)           |              |                   |         | CoronaVac (N=37)        |         |                   |         |
|----------------------|----------------------------|--------------|-------------------|---------|-------------------------|---------|-------------------|---------|
|                      | AUC of spikeRBD IgG        | p-value      | sVNT-200          | p-value | AUC of spikeRBD IgG     | p-value | sVNT-10           | p-value |
| No                   | 8657.5 (7516.5, 10869.5)   |              | 42.0 (32.1, 54.1) |         | 1725.0 (1418.0, 2459.0) |         | 57.6 (42.1, 69.3) |         |
| Yes                  | 10672.5 (8403.0, 12651.5)  |              | 51.9 (44.2, 58.2) |         | NA                      |         | NA                |         |
| Constipation         |                            | <b>0.031</b> |                   | 0.182   |                         | -       |                   | -       |
| No                   | 8707.0 (7688.0, 11058.0)   |              | 42.9 (33.3, 54.5) |         | 1725.0 (1418.0, 2459.0) |         | 57.6 (42.1, 69.3) |         |
| Yes                  | 6519.0 (6024.5, 6962.0)    |              | 28.4 (17.0, 38.4) |         | NA                      |         | NA                |         |
| Abdominal distension |                            | 0.396        |                   | 0.443   |                         | -       |                   | -       |
| No                   | 8696.0 (7628.0, 11058.0)   |              | 42.6 (33.1, 54.4) |         | 1725.0 (1418.0, 2459.0) |         | 57.6 (42.1, 69.3) |         |
| Yes                  | 8347.0 (7433.0, 8527.0)    |              | 48.3 (43.9, 53.1) |         | NA                      |         | NA                |         |
| Nausea               |                            | <b>0.031</b> |                   | 0.711   |                         | -       |                   | -       |
| No                   | 8656.0 (7405.0, 10667.0)   |              | 42.9 (33.1, 54.4) |         | 1725.0 (1418.0, 2459.0) |         | 57.6 (42.1, 69.3) |         |
| Yes                  | 12084.0 (11764.5, 12873.5) |              | 41.0 (40.8, 48.1) |         | NA                      |         | NA                |         |
| Flushing             |                            | 0.740        |                   | 0.452   |                         | -       |                   | -       |
| No                   | 8677.5 (7405.0, 11058.0)   |              | 42.7 (33.3, 54.5) |         | 1725.0 (1418.0, 2459.0) |         | 57.6 (42.1, 69.3) |         |
| Yes                  | 8358.5 (7994.0, 8723.0)    |              | 34.8 (26.4, 43.2) |         | NA                      |         | NA                |         |
| Hypersensitivity     |                            | -            |                   | -       |                         | -       |                   | -       |
| No                   | 8696.0 (7516.5, 11053.0)   |              | 42.9 (33.3, 54.4) |         | 1687.5 (1385.5, 2523.0) |         | 55.7 (40.4, 68.5) |         |
| Yes                  | NA                         |              | NA                |         | NA                      |         | NA                |         |
| Muscle spasms        |                            | -            |                   | -       |                         | -       |                   | -       |
| No                   | 8659.0 (7516.5, 11053.0)   |              | 42.9 (33.2, 54.4) |         | 1687.5 (1385.5, 2523.0) |         | 55.7 (40.4, 68.5) |         |
| Yes                  | NA                         |              | NA                |         | NA                      |         | NA                |         |
| Nasal Congestion     |                            | 0.667        |                   | 0.853   |                         | -       |                   | -       |
| No                   | 8677.5 (7628.0, 11048.0)   |              | 42.7 (33.1, 54.4) |         | 1725.0 (1418.0, 2459.0) |         | 57.6 (42.1, 69.3) |         |
| Yes                  | 8257.5 (4888.0, 11627.0)   |              | 45.0 (33.3, 56.8) |         | NA                      |         | NA                |         |
| Edema                |                            | -            |                   | -       |                         | -       |                   | -       |
| No                   | 8659.0 (7516.5, 11053.0)   |              | 42.9 (33.2, 54.4) |         | 1725.0 (1418.0, 2459.0) |         | 57.6 (42.1, 69.3) |         |
| Yes                  | NA                         |              | NA                |         | NA                      |         | NA                |         |
| Vomiting             |                            | -            |                   | -       |                         | -       |                   | -       |

**Supplementary Table 11. The association between immunity response and adverse events after second dose of vaccination (Overall)**

| Adverse events                    | BNT162b2 (N=101)         |         |                   |         | CoronaVac (N=37)        |         |                   |         |
|-----------------------------------|--------------------------|---------|-------------------|---------|-------------------------|---------|-------------------|---------|
|                                   | AUC of spikeRBD IgG      | p-value | sVNT-200          | p-value | AUC of spikeRBD IgG     | p-value | sVNT-10           | p-value |
| No                                | 8659.0 (7516.5, 11053.0) |         | 42.7 (33.2, 54.4) |         | 1725.0 (1418.0, 2459.0) |         | 57.6 (42.1, 69.3) |         |
| Yes                               | NA                       |         | NA                |         | NA                      |         | NA                |         |
| Tremor                            |                          | -       |                   | -       |                         | -       |                   | -       |
| No                                | 8659.0 (7516.5, 11053.0) |         | 42.7 (33.2, 54.4) |         | 1725.0 (1418.0, 2459.0) |         | 57.6 (42.1, 69.3) |         |
| Yes                               | NA                       |         | NA                |         | NA                      |         | NA                |         |
| Eyelid edema                      |                          | -       |                   | -       |                         | -       |                   | -       |
| No                                | 8659.0 (7516.5, 11053.0) |         | 42.7 (33.2, 54.4) |         | 1725.0 (1418.0, 2459.0) |         | 57.6 (42.1, 69.3) |         |
| Yes                               | NA                       |         | NA                |         | NA                      |         | NA                |         |
| Nosebleeds                        |                          | -       |                   | -       |                         | -       |                   | -       |
| No                                | 8659.0 (7516.5, 11053.0) |         | 42.7 (33.2, 54.4) |         | 1725.0 (1418.0, 2459.0) |         | 57.6 (42.1, 69.3) |         |
| Yes                               | NA                       |         | NA                |         | NA                      |         | NA                |         |
| Hyposmia                          |                          | -       |                   | -       |                         | -       |                   | -       |
| No                                | 8659.0 (7516.5, 11053.0) |         | 42.7 (33.2, 54.4) |         | 1725.0 (1418.0, 2459.0) |         | 57.6 (42.1, 69.3) |         |
| Yes                               | NA                       |         | NA                |         | NA                      |         | NA                |         |
| Ocular congestion                 |                          | -       |                   | -       |                         | -       |                   | -       |
| No                                | 8659.0 (7516.5, 11053.0) |         | 42.7 (33.2, 54.4) |         | 1725.0 (1418.0, 2459.0) |         | 57.6 (42.1, 69.3) |         |
| Yes                               | NA                       |         | NA                |         | NA                      |         | NA                |         |
| Number of adverse events (listed) |                          | 0.320   |                   | 0.064   |                         | 0.531   |                   | 0.702   |
| 0                                 | 9701.0 (9062.0, 12659.0) |         | 44.1 (39.3, 46.4) |         | 1634.0 (1385.5, 2325.5) |         | 52.2 (48.7, 72.7) |         |
| 1                                 | 8007.0 (6875.0, 9575.0)  |         | 41.9 (29.9, 52.6) |         | 1725.0 (1399.0, 2416.0) |         | 51.8 (36.5, 67.0) |         |
| 2                                 | 8576.0 (6589.5, 10089.5) |         | 35.9 (26.2, 45.8) |         | 1650.0 (1486.0, 2835.0) |         | 65.9 (57.6, 66.1) |         |
| >=3                               | 8715.0 (7846.0, 11445.0) |         | 44.3 (39.4, 56.5) |         | 1977.0 (1558.0, 2181.0) |         | 69.6 (45.7, 79.3) |         |
| Others <sup>1</sup>               |                          | 0.595   |                   | 0.300   |                         | -       |                   | -       |
| No                                | 8707.0 (7675.0, 11058.0) |         | 41.3 (31.1, 54.4) |         | 1687.5 (1385.5, 2523.0) |         | 57.9 (40.4, 69.5) |         |
| Yes                               | 8347.0 (7415.5, 9748.5)  |         | 46.4 (37.8, 55.0) |         | NA                      |         | NA                |         |

sVNT-10: sVNT of 10-fold diluted plasma; sVNT-200: sVNT of 200-fold diluted plasma. Data are median (IQR). NA, Not applicable. There is one missing data in BNT162b2 group.  
1. Others include low back pain, increase of appetite, muscle pain, rib pain, eyes pain, palpitations.

## Supplementary references

1. Perera RA, Mok CK, Tsang OT. *et al.* Serological assays for severe acute respiratory syndrome coronavirus 2 (SARS-CoV-2), March 2020. *Euro Surveill* 2020;**25**:200042. doi:10.2807/1560-7917.ES.2020.25.16.2000421
2. Perera R, Ko R, Tsang OT. *et al.* Evaluation of a SARS-CoV-2 surrogate virus neutralization test for detection of antibody in human, canine, cat, and hamster sera. *J Clin Microbiol* 2021;**59**:e02504-20. doi:10.1128/JCM.02504-20
3. Zuo T, Zhang F, Liu GCY. *et al.* Alterations in gut microbiota of patients with COVID-19 during time of hospitalization. *Gastroenterology* 2020;**159**:944–955. doi:10.1053/j.gastro.2020.05.048
4. Yeoh YK, Zuo T, Liu GCY. *et al.* Gut microbiota composition reflects disease severity and dysfunctional immune responses in patients with COVID-19. *Gut* 2021;**70**:698-706. doi:10.1136/gutjnl-2020-323020
5. Guittar J, Shade A, Litchman E. Trait-based community assembly and succession of the infant gut microbiome. *Nat Commun* 2019;**10**:512. doi:10.1038/s41467-019-08377-w.
6. Zhang X, Yi N. NBZIMM: negative binomial and zero-inflated mixed models, with application to microbiome/metagenomics data analysis. *BMC Bioinformatics* 2020;**21**:488. doi:10.1186/s12859-020-03803-z
7. Segata N, Lzard J, Waldron L, *et al.* Metagenomic biomarker discovery and explanation. *Genome Biol* 2011;**12**: R60. doi: 10.1186/gb-2011-12-6-r60.
8. Pernigoni N, Zagato E, Calcinotto A, *et al.* Commensal bacteria promote endocrine resistance in prostate cancer through androgen biosynthesis. *Science* 2021; **374**: 216-224. doi: 10.1126/science.abf8403.
